# Supplementary material for: Androgen-Responsive Oncogenic lncRNA RP11-1023L17.1 Enhances c-Myc Protein Stability in Prostate Cancer
Source: MDPI journal article supplement (doi:10.3390/ijms232012219), 2022-10-13
Supplement: s1 [file s1]

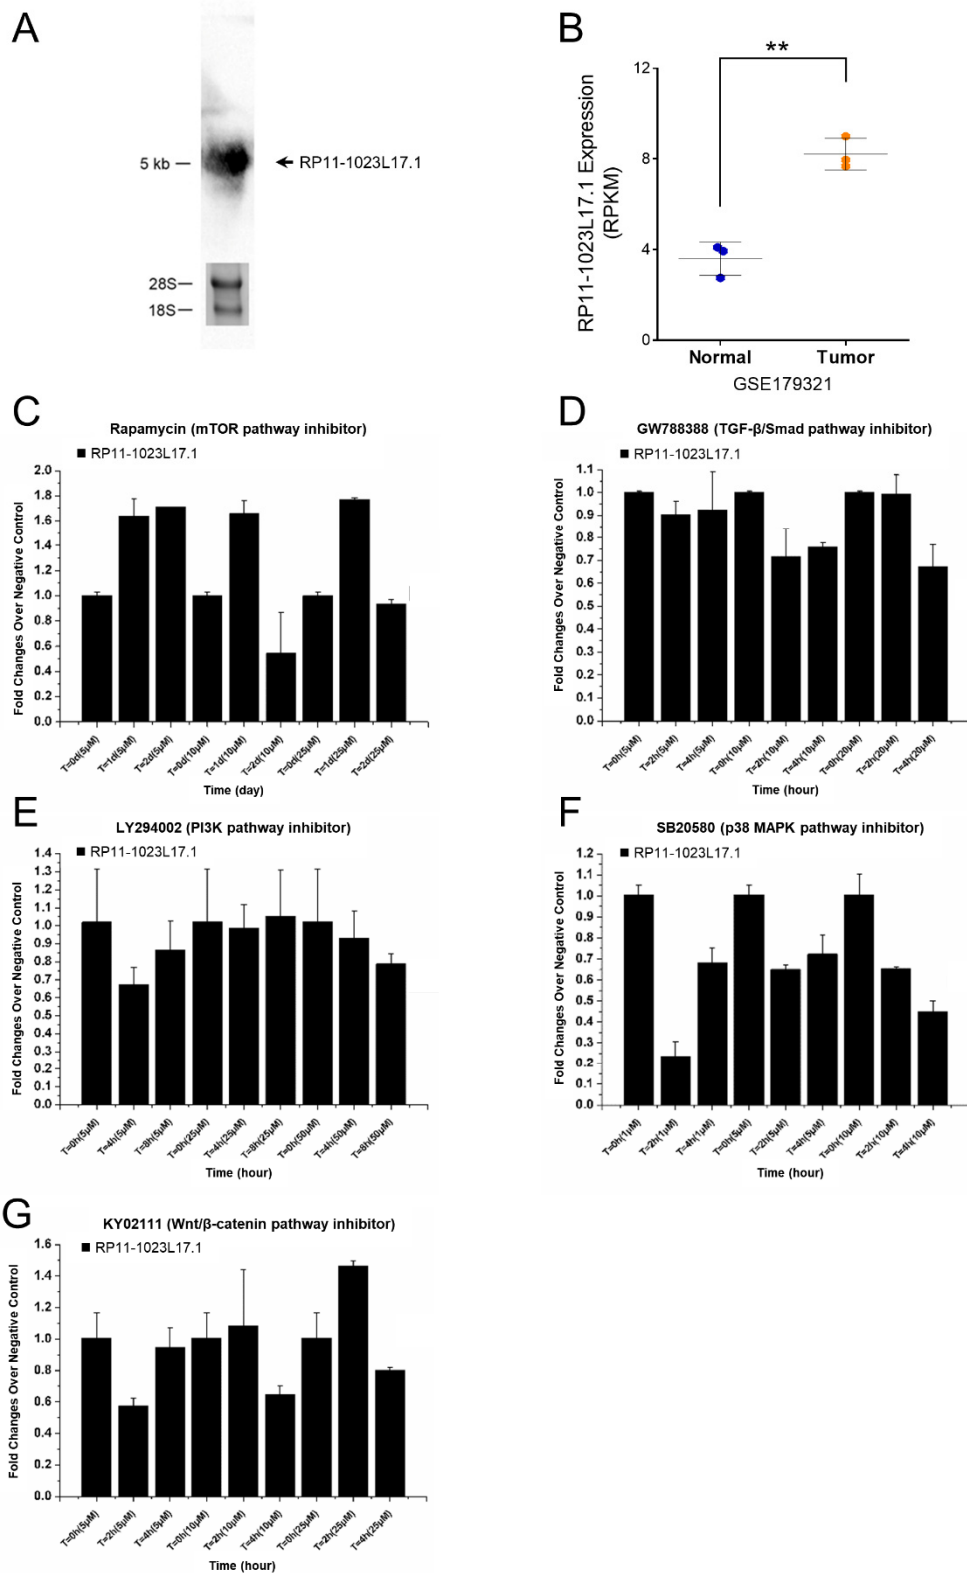

**Supplementary Figure S1.** p38-MAPK signaling pathway may regulate RP11-1023L17.1 expression in androgen-independent PCa. (A) The full-length transcript of RP11-1023L17.1 was defined in LNCaP cells using northern blot analysis. 18S and 28S ribosomal RNAs were used as internal controls. (B) The GEO dataset GSE179321 analysis showed the expression of RP11-1023L17.1 in prostate cancer tissues and adjacent normal tissues. (B-F) PC-3 cells were treated with pathway-specific inhibitors KY02111 (Wnt/ $\beta$ -catenin pathway, B), Rapamycin GW788388 (TGF- $\beta$ /Smad pathway, D), LY294002 (PI3K pathway, E),

SB20580 (p38 MAPK pathway, F), or (mTOR pathway, G) in concentration and time series. The changes of RP11-1023L17.1 expression were measured by qRT-PCR. Data are presented as mean  $\pm$  SD (n  $\geq$  3).

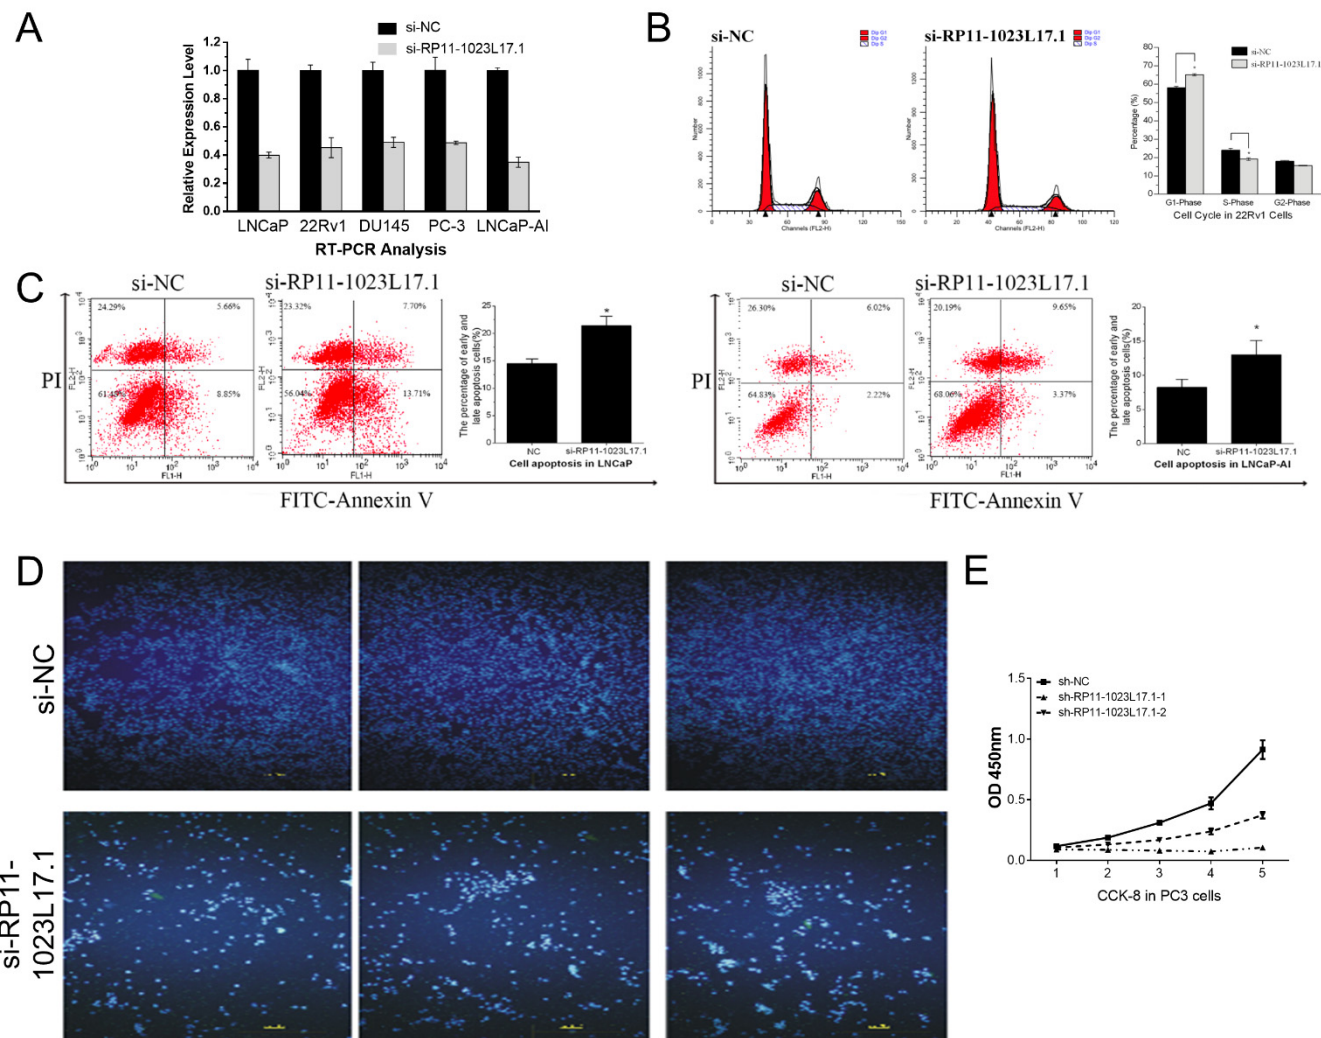

**Supplementary Figure S2.** RP11-1023L17.1 may play a proto-oncogenic role in PCa. **(A)** The siRNA silencing efficacy of RP11-1023L17.1 in PCa cell lines was measured by qRT-PCR. **(B)** The 22Rv1 cells transfected with si-NC or si-RP11-1023L17.1 were stained with propidium iodide (PI), and the cell cycle distributions were evaluated by flow cytometry. **(C)** The LNCaP and LNCaP-AI cells transfected with si-NC or siRNA targeting RP11-1023L17.1 were stained with annexin V and PI, and the cell apoptosis was evaluated by flow cytometry. **(D)** The cell migration was monitored by transwell assay in PC-3 cells transfected with si-NC or si-RP11-1023L17.1. **(E)** The cell proliferations of PC-3 sh-NC or sh-RP11-1023L17.1 cell line were measured by CCK-8 assay. Data are presented as mean  $\pm$  SD (n  $\geq$ 3).

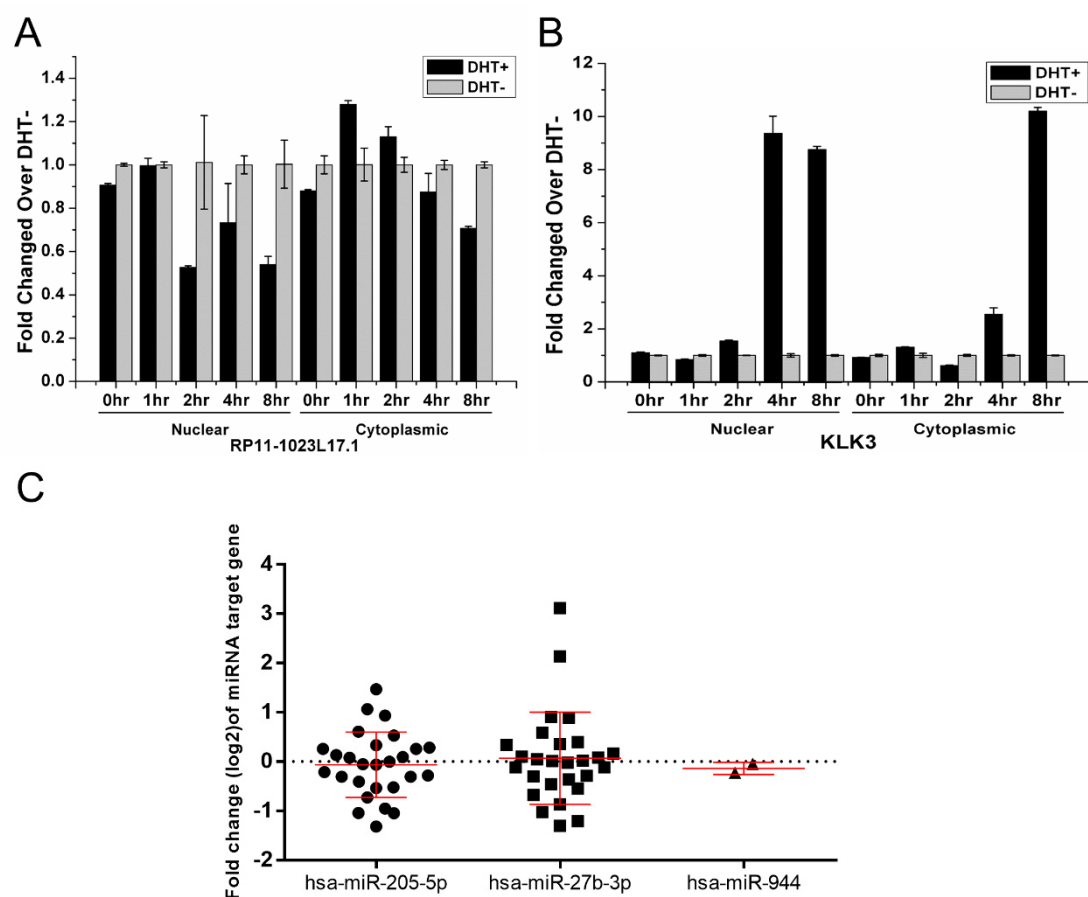

**Supplementary Figure S3.** RP11-1023L17.1 may not function as a miRNA sponge through the ceRNA mechanism-1. (A-B) LNCaP cells were treated with 10 nM DHT (DHT+) or ethanol (DHT-) for a time series, and nuclear and cytoplasmic RNA fractions were isolated. The relative expressions of RP11-1023L17.1 (A) and KLK3 (positive control, B) were measured by qRT-PCR. Data are presented as mean  $\pm$  SD ( $n \geq 3$ ). (C) Fold change (log2) of miRNA target gene in RP11-1023L17.1 knockdown microarray. Data are presented as mean  $\pm$  SD ( $n \geq 3$ ).

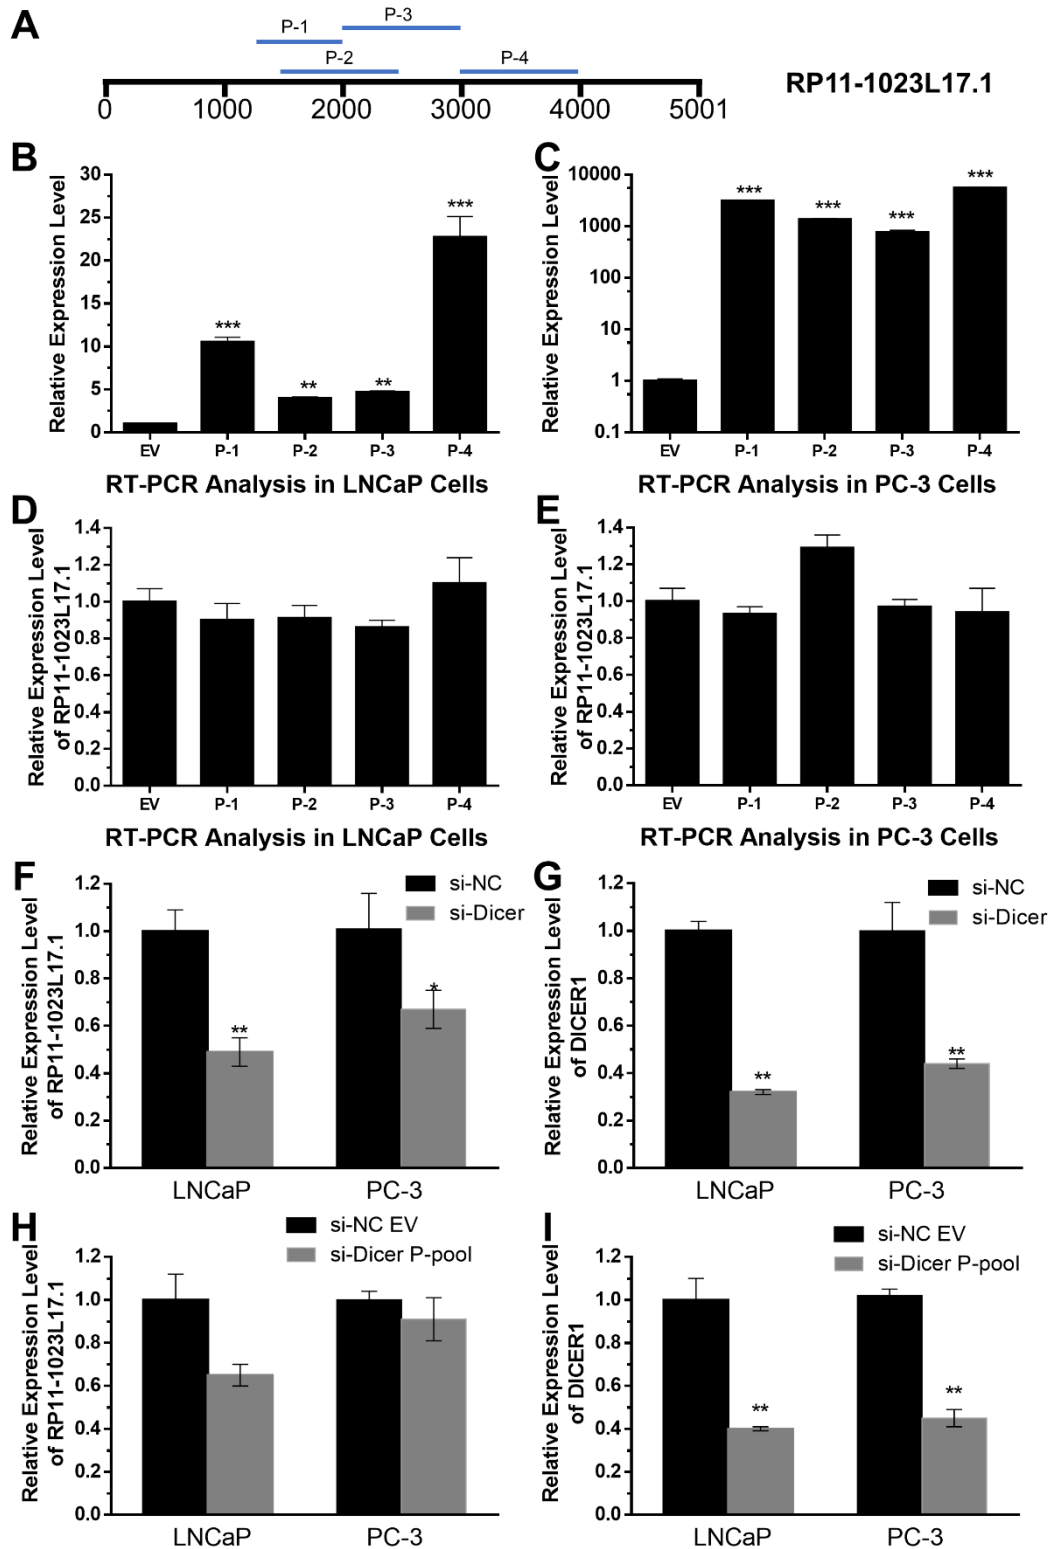

**Supplementary Figure S4.** RP11-1023L17.1 may not function as a miRNA sponge through the ceRNA mechanism-2. (A) Illustration of the P-1, P-2, P-3, P-4 fragments of lncRNA RP11-1023L17.1. (B-E) The expression efficacy of P-1, P-2, P-3, P-4 fragments (B, C) and the relative expression of RP11-1023L17.1 (D, E) in LNCaP (B, D) and PC-3 (C, E) cells transfected with P-1, P-2, P-3, P-4 fragments expression plasmids were measured by qRT-PCR. (F-G) The relative expression of RP11-1023L17.1 (F) and Dicer (G) in LNCaP and PC-3 cells transfected with si-NC or siRNA targeting Dicer (si-Dicer) were measured by qRT-PCR. (H-I) The relative expression of RP11-1023L17.1 (H) and Dicer (I) in LNCaP and PC-3 cells co-transfected with si-NC and empty vector (EV), or si-Dicer and pool of P-1, P-2, P-3, P-4 fragments expression plasmids were measured by qRT-PCR. Data are presented as mean  $\pm$  SD (n  $\geq$  3).

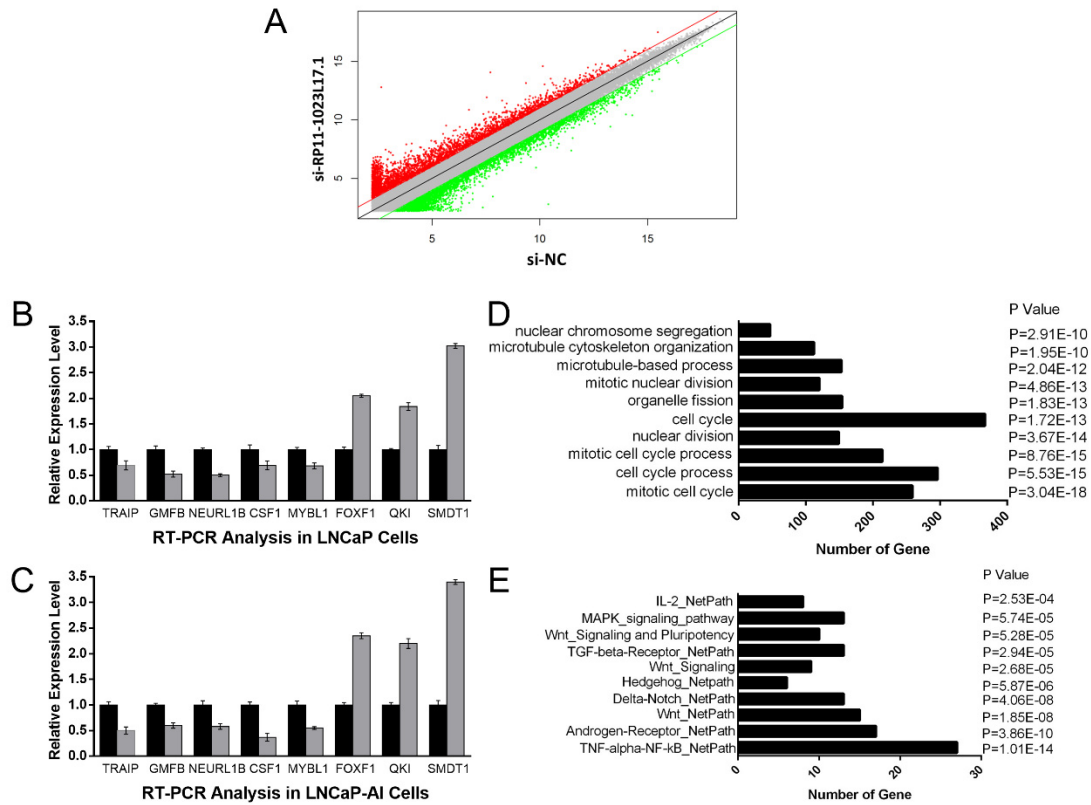

**Supplementary Figure S5.** Microarray analysis after RP11-1023L17.1 knockdown in LNCaP cells. **(A)** Scatter plot comparing the normalized (RPKM) expression values for all genes of RNA-seq analysis in LNCaP cells transfected with si-NC or si-RP11-1023L17.1, of which 2780 genes were upregulated (red points) and 2391 downregulated (green points) for more than 2-fold. **(B-C)** The relative expression of eight randomly selected genes in LNCaP (B) and LNCaP-AI (C) cells transfected with si-NC or si-RP11-1023L17.1 were measured by qRT-PCR. Data are presented as mean  $\pm$  SD ( $n \geq 3$ ). **(D-E)** GO (D) and KEGG (E) pathway enrichment analysis of microarray differentially expressed genes.

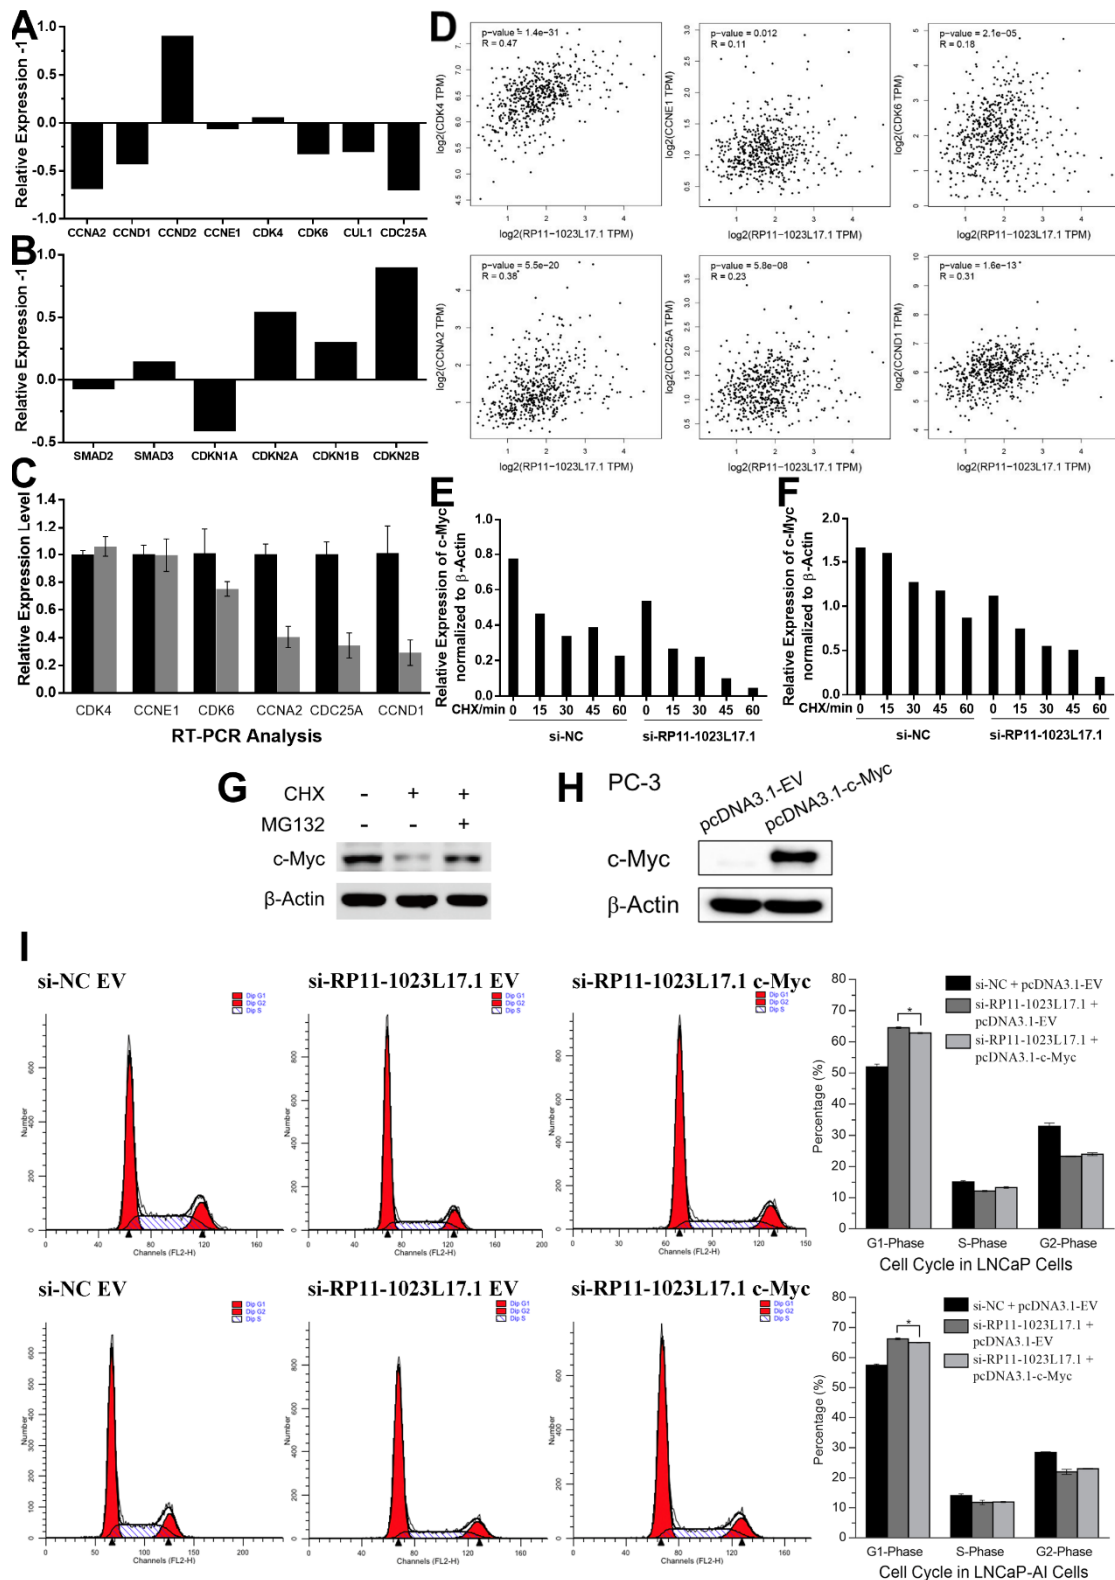

**Supplementary Figure S6.** The expression of c-Myc target genes in RP11-1023L17.1 knockdown microarray analysis. (A-B) The expression of genes up (A) or down (B)-regulated by c-Myc in microarray data. (C) The relative expression of c-Myc target genes in LNCaP cells transfected with si-NC or si-RP11-1023L17.1 were measured by qRT-PCR. Data are presented as mean  $\pm$  SD ( $n \geq 3$ ). (D) Analysis of the expression correlation between RP11-1023L17.1 and c-Myc target genes in PCa and normal tissues of the TCGA database. (E-F) Quantification of c-Myc normalized on  $\beta$ -Actin in LNCaP(E) and 22Rv1(F) and represented in the bars graph (G) Assessment of c-Myc expression



by western blotting in LNCaP cells treated with CHX and/or MG132. **(H)** Assessment of c-Myc expression by western blotting in PC-3 cells transfected with pcDNA3.1-EV or pcDNA3.1-c-Myc.  $\beta$ -actin was used as a loading control. **(I)** The LNCaP and LNCaP-AI cells co-transfected with si-NC or si-RP11-1023L17.1 and EV or pcDNA3.1-c-Myc were stained with propidium iodide (PI), and the cell cycle distributions were evaluated by flow cytometry. \* $p < 0.05$ , and data are presented as mean  $\pm$  SD ( $n \geq 3$ ).

**Table S1.** Sequences of siRNAs

| siRNA              | Sequence                        |
|--------------------|---------------------------------|
| si-NC              | 5'- UUCUCCGAACGUGUCACGUTT - 3'  |
| si- RP11-1023L17.1 | 5'- GGCCCGAUGGUCUUCAUAATT - 3'  |
| si- c-Myc          | 5'- AGACCUUCAUCAAAAAACAUTT - 3' |
| si-Dicer           | 5'- AAGGCUUACCUUCUCCAGGCT - 3'  |
| si-AR-544          | 5'- GACAGUGUCACACAUUGAATT - 3'  |
| si-AR-357          | 5'- GGAGCUCUCACAUGUGGAATT - 3'  |
| si-FBXO32          | 5'- CUUGUCCGAUGUUACCCAATT - 3'  |

**Table S2.** Sequences of primers

| Use                     | Primer                     | Sequence                                                |
|-------------------------|----------------------------|---------------------------------------------------------|
| qRT-PCR                 | RP11-1023L17.1-F           | 5'- GATTTACTTTTGGGATACACTCATCAT - 3'                    |
| qRT-PCR                 | RP11-1023L17.1-R           | 5'- ACAGGTGACTTCATCTTGGATTT - 3'                        |
| qRT-PCR                 | c-Myc -F                   | 5'- GCGAACACACAACGTCTTGG - 3'                           |
| qRT-PCR                 | c-Myc -R                   | 5'- CTACCTTGGGGGCCTTTTCA - 3'                           |
| qRT-PCR                 | $\beta$ -actin-F           | 5'- CCTCTCCCAAGTCCACACAG - 3'                           |
| qRT-PCR                 | $\beta$ -actin-R           | 5'- GGGCACGAAGGCTCATCATT - 3'                           |
| qRT-PCR                 | AR-F                       | 5'- GCCTTGCTCTCTAGCCTCAA - 3'                           |
| qRT-PCR                 | AR-R                       | 5'- GGTCGTCCACGTGTAAGTTG - 3'                           |
| qRT-PCR                 | KLK3-F                     | 5'- GTGCTTGTGGCCTCTCGT - 3'                             |
| qRT-PCR                 | KLK3-R                     | 5'- CAGCAAGATCACGCTTTTGT - 3'                           |
| CHIP-PCR                | RP11-1023L17.1-ARE<br>-F-1 | 5'- GGCAGTCTTGGGACTTGGG-3'                              |
| CHIP-PCR                | RP11-1023L17.1-ARE<br>-R-1 | 5'- AACAGGGGCTTCGGGTG-3'                                |
| CHIP-PCR                | RP11-1023L17.1-ARE<br>-F-2 | 5'- CATTGAGTAGTGACCCCGACG -3'                           |
| CHIP-PCR                | RP11-1023L17.1-ARE<br>-R-2 | 5'- GGATGCCAGCATGAGAAGAAC -3'                           |
| CHIP-PCR                | KLK3-ARE -F                | 5'- TGGGACAACTTGCAAACCTG-3'                             |
| CHIP-PCR                | KLK3-ARE -R                | 5'- CCAGAGTAGGTCTGTTTTCAATCCA-3'                        |
| CHIP-PCR                | XBP-ARE -F                 | 5'- TCTGGAAAGCTCTCGGTTTG 3'                             |
| CHIP-PCR                | XBP-ARE -R                 | 5'- AATCCCTGGCCAAAGGTACT 3'                             |
| Plasmid<br>construction | c-Myc-clone-F              | 5'- CTGGATTTTTTTTCGGGTAGTGG -3'                         |
| Plasmid<br>construction | c-Myc-clone-R              | 5'- TTACGCACAAGAGTTCCTAGC -3'                           |
| Plasmid<br>construction | RP11-1023L17.1-T7-F        | 5'-<br>TAATACGACTCACTATAGGGGGGAACAGAGCA<br>ACAGTCTC -3' |
| Plasmid<br>construction | RP11-1023L17.1-T7-R        | 5'- ATTAAGCTAGGACGTGACTTGG -3'                          |
