# Supplementary material for: Androgen-Responsive Oncogenic lncRNA RP11-1023L17.1 Enhances c-Myc Protein Stability in Prostate Cancer
Source: Int J Mol Sci. 2022 Oct 13;23(20):12219. doi: 10.3390/ijms232012219 (PMC9603324; doi:10.3390/ijms232012219)
Supplement: Supplementary file 1 [file ijms-23-12219-s001.zip]

Archive with 5 entries (5 files):
- ijms-1904132-supplemantary.pdf
- Table S3.xlsx
- Table S4.xlsx
- Table S5.xlsx
- Table S6.xlsx
