# Supplementary material for: Androgen-Responsive Oncogenic lncRNA RP11-1023L17.1 Enhances c-Myc Protein Stability in Prostate Cancer
Source: Int J Mol Sci. 2022 Oct 13;23(20):12219. doi: 10.3390/ijms232012219 (PMC9603324; doi:10.3390/ijms232012219)
Supplement: Supplementary file 1 [file ijms-23-12219-s001.zip › Table S3.xlsx]

## Sheet: Sheet1
Target Rank	Target Score	miRNA Name
1	100	hsa-miR-6867-5p
2	94	hsa-miR-8485
3	94	hsa-miR-5011-5p
4	92	hsa-miR-7110-3p
5	91	hsa-miR-6817-3p
6	88	hsa-miR-361-5p
7	88	hsa-miR-548l
8	88	hsa-miR-548y
9	88	hsa-miR-548w
10	88	hsa-miR-548o-5p
11	88	hsa-miR-548h-5p
12	88	hsa-miR-548d-5p
13	88	hsa-miR-548c-5p
14	88	hsa-miR-548bb-5p
15	88	hsa-miR-548b-5p
16	88	hsa-miR-548ay-5p
17	88	hsa-miR-548au-5p
18	88	hsa-miR-548ar-5p
19	88	hsa-miR-548aq-5p
20	88	hsa-miR-548am-5p
21	88	hsa-miR-548ak
22	88	hsa-miR-548ae-5p
23	88	hsa-miR-548ad-5p
24	87	hsa-miR-4529-3p
25	86	hsa-miR-190a-3p
26	86	hsa-miR-548j-5p
27	86	hsa-miR-548i
28	86	hsa-miR-548as-5p
29	86	hsa-miR-548ap-5p
30	86	hsa-miR-548ab
31	86	hsa-miR-548a-5p
32	86	hsa-miR-337-3p
33	86	hsa-miR-216a-3p
34	86	hsa-miR-128-3p
35	85	hsa-miR-944
36	85	hsa-miR-5587-5p
37	84	hsa-miR-559
38	84	hsa-miR-5692a
39	83	hsa-miR-6873-3p
40	82	hsa-miR-135a-3p
41	82	hsa-miR-3646
42	81	hsa-miR-4738-3p
43	81	hsa-miR-6876-3p
44	81	hsa-miR-626
45	80	hsa-miR-450a-1-3p
46	79	hsa-miR-4778-5p
47	79	hsa-miR-4515
48	79	hsa-miR-4311
49	79	hsa-miR-3681-3p
50	78	hsa-miR-4774-5p
51	78	hsa-miR-182-5p
52	77	hsa-miR-107
53	77	hsa-miR-103a-3p
54	76	hsa-miR-7850-5p
55	76	hsa-miR-5692c
56	76	hsa-miR-5692b
57	75	hsa-miR-3120-5p
58	75	hsa-miR-153-5p
59	74	hsa-miR-6857-3p
60	73	hsa-miR-3686
61	73	hsa-miR-4755-3p
62	73	hsa-miR-6764-5p
63	73	hsa-miR-6500-3p
64	72	hsa-miR-9718
65	72	hsa-miR-3928-3p
66	72	hsa-miR-5694
67	71	hsa-miR-4766-3p
68	71	hsa-miR-4262
69	70	hsa-miR-3134
70	70	hsa-miR-1915-3p
71	70	hsa-miR-3059-5p
72	70	hsa-miR-1260b
73	70	hsa-miR-1260a
74	69	hsa-miR-181d-5p
75	69	hsa-miR-181c-5p
76	69	hsa-miR-181b-5p
77	69	hsa-miR-181a-5p
78	69	hsa-miR-12130
79	69	hsa-miR-4282
80	69	hsa-miR-2115-3p
81	68	hsa-miR-4703-5p
82	68	hsa-miR-12135
83	67	hsa-miR-12114
84	67	hsa-miR-144-3p
85	67	hsa-miR-1277-5p
86	67	hsa-miR-4691-5p
87	67	hsa-miR-5004-3p
88	67	hsa-miR-628-5p
89	67	hsa-miR-3160-3p
90	66	hsa-miR-7705
91	65	hsa-miR-297
92	65	hsa-miR-5196-3p
93	64	hsa-miR-5007-3p
94	64	hsa-miR-3942-5p
95	64	hsa-miR-7111-5p
96	64	hsa-miR-6870-5p
97	64	hsa-miR-5698
98	64	hsa-miR-4723-5p
99	64	hsa-miR-5000-5p
100	63	hsa-miR-223-5p
101	63	hsa-miR-302d-5p
102	63	hsa-miR-302b-5p
103	63	hsa-miR-6749-3p
104	63	hsa-miR-1269b
105	63	hsa-miR-1269a
106	62	hsa-miR-30e-5p
107	62	hsa-miR-30d-5p
108	62	hsa-miR-30c-5p
109	62	hsa-miR-30b-5p
110	62	hsa-miR-30a-5p
111	62	hsa-miR-3662
112	62	hsa-miR-4307
113	61	hsa-miR-498-5p
114	60	hsa-miR-766-5p
115	60	hsa-miR-8054
116	60	hsa-miR-548k
117	60	hsa-miR-548av-5p
118	59	hsa-miR-4420
119	59	hsa-miR-181b-3p
120	59	hsa-miR-181b-2-3p
121	58	hsa-miR-9985
122	58	hsa-miR-27b-3p
123	58	hsa-miR-27a-3p
124	58	hsa-miR-5089-5p
125	58	hsa-miR-3924
126	58	hsa-miR-6874-3p
127	58	hsa-miR-148b-5p
128	58	hsa-miR-4659b-3p
129	58	hsa-miR-4659a-3p
130	57	hsa-miR-6792-3p
131	57	hsa-miR-548z
132	57	hsa-miR-548h-3p
133	57	hsa-miR-548d-3p
134	57	hsa-miR-548bb-3p
135	57	hsa-miR-548ac
136	56	hsa-miR-3922-3p
137	56	hsa-miR-6864-3p
138	56	hsa-miR-3672
139	56	hsa-miR-548p
140	56	hsa-miR-3148
141	56	hsa-miR-4520-2-3p
142	56	hsa-miR-3688-3p
143	56	hsa-miR-4288
144	56	hsa-miR-6884-3p
145	55	hsa-miR-6787-3p
146	55	hsa-miR-6849-3p
147	55	hsa-miR-6836-3p
148	54	hsa-miR-1261
149	54	hsa-miR-130a-5p
150	54	hsa-miR-6875-3p
151	54	hsa-miR-1250-3p
152	54	hsa-miR-7159-3p
153	53	hsa-miR-4507
154	53	hsa-miR-3940-5p
155	53	hsa-miR-4803
156	53	hsa-miR-561-3p
157	53	hsa-miR-12123
158	53	hsa-miR-6889-3p
159	52	hsa-miR-590-3p
160	52	hsa-miR-567
161	52	hsa-miR-513c-3p
162	52	hsa-miR-513a-3p
163	51	hsa-miR-126-5p
164	51	hsa-miR-12126
165	51	hsa-miR-4450
166	51	hsa-miR-3180-5p
167	51	hsa-miR-513b-5p
168	51	hsa-miR-4778-3p
169	51	hsa-miR-548x-5p
170	51	hsa-miR-548g-5p
171	51	hsa-miR-548f-5p
172	51	hsa-miR-548aj-5p
173	51	hsa-miR-4795-3p
174	51	hsa-miR-517c-3p
175	51	hsa-miR-517b-3p
176	51	hsa-miR-517a-3p
177	50	hsa-miR-3942-3p
178	50	hsa-miR-205-5p
179	50	hsa-miR-200b-5p
180	50	hsa-miR-200a-5p
181	50	hsa-miR-7159-5p
182	50	hsa-miR-4733-5p
