# Supplementary material for: Androgen-Responsive Oncogenic lncRNA RP11-1023L17.1 Enhances c-Myc Protein Stability in Prostate Cancer
Source: Int J Mol Sci. 2022 Oct 13;23(20):12219. doi: 10.3390/ijms232012219 (PMC9603324; doi:10.3390/ijms232012219)
Supplement: Supplementary file 1 [file ijms-23-12219-s001.zip › Table S4.xlsx]

## Sheet: Sheet1
miRNA	Target gene of miRNA	Pearson correlation coefficient (RP11-1023L17.1 vs. target gene)				RP11-1023L17.1 knockdown microarray
		r	95% confidence interval	R square	P value (two-tailed)	Normalized signal (log2) of si-NC	Normalized signal (log2) of si-RP11-1023L7.1	Fold change (log2)
hsa-miR-205-5p	INPPL1	0.3931	0.3201 to 0.4615	0.1545	< 0.0001	10.7228	10.1839	-0.538894
	AR	0.3156	0.2384 to 0.3889	0.09963	< 0.0001	4.98524	5.07628	0.0910396
	MED1	0.3085	0.2309 to 0.3822	0.09515	< 0.0001	8.15763	8.09527	-0.062364
	YY1	0.2617	0.1821 to 0.3378	0.06847	< 0.0001	12.793	12.581	-0.211985
	ERBB3	0.2597	0.1800 to 0.3359	0.06742	< 0.0001	5.43867	5.38651	-0.0521665
	LAMC1	0.2593	0.1796 to 0.3355	0.06721	< 0.0001	10.7416	10.4602	-0.281434
	PHLPP2	0.2534	0.1735 to 0.3300	0.06421	< 0.0001	9.63424	8.3167	-1.31754
	KCNJ10	0.253	0.1731 to 0.3296	0.06403	< 0.0001	2.35079	2.3468	-0.0039916
	E2F1	0.2299	0.1492 to 0.3076	0.05287	< 0.0001	11.1636	10.1188	-1.04477
	SMAD1	0.209	0.1277 to 0.2876	0.04369	< 0.0001	10.2447	9.29474	-0.949981
	ACSL1	0.2043	0.1228 to 0.2830	0.04174	< 0.0001	9.69888	8.65066	-1.04822
	HMGB3	0.2008	0.1192 to 0.2796	0.04031	< 0.0001	12.365	11.8443	-0.520751
	HMGB1	0.1469	0.06417 to 0.2277	0.02159	0.0005	14.4649	14.0573	-0.407565
	PTPRM	0.1236	0.04043 to 0.2050	0.01527	0.0037	10.4125	10.6723	0.259803
	EGLN2	0.1159	0.03265 to 0.1975	0.01343	0.0065	8.77798	8.85778	0.0798
	SMAD4	0.09894	0.01551 to 0.1810	0.009788	0.0202	8.27222	7.96196	-0.310259
	VEGFA	0.09432	0.01085 to 0.1765	0.008896	0.0268	9.18458	9.70933	0.524748
	IL24	0.08492	0.001383 to 0.1673	0.007212	0.0463	6.25139	6.5347	0.283309
	LRP1	0.06692	-0.01672 to 0.1496	0.004479	0.1166	7.6478	8.58311	0.935305
	BCL2	0.01844	-0.06522 to 0.1018	0.0003399	0.6659	11.0232	10.7145	-0.308611
	ZEB2	0.00894	-0.07467 to 0.09242	7.993e-05	0.8341	2.92245	3.985	1.06255
	LRRK2	-0.002934	-0.08646 to 0.08064	8.611e-06	0.9452	5.15079	5.48151	0.330719
	IL32	-0.004909	-0.08842 to 0.07867	2.41e-05	0.9085	9.61143	8.88338	-0.728047
	ZEB1	-0.01552	-0.09894 to 0.06812	0.0002407	0.7163	7.23896	7.84421	0.605245
	PTEN	-0.01556	-0.09899 to 0.06808	0.0002422	0.7155	4.14945	4.28388	0.13443
	ACSL4	-0.05141	-0.1344 to 0.03227	0.002643	0.2282	9.06788	9.32815	0.260271
	ITGA5	-0.1403	-0.2213 to -0.05742	0.01968	0.001	9.44002	10.9086	1.46854
hsa-miR-27b-3p	S100PBP	0.3992	0.3266 to 0.4672	0.1594	< 0.0001	9.97547	9.5111	-0.464367
	CCNT1	0.326	0.2492 to 0.3987	0.1063	< 0.0001	10.412	10.7511	0.339088
	WEE1	0.2686	0.1893 to 0.3445	0.07217	< 0.0001	8.49308	7.47167	-1.0214
	ABCA1	0.2677	0.1883 to 0.3435	0.07165	< 0.0001	8.09224	10.2258	2.13353
	CREB1	0.2504	0.1704 to 0.3271	0.06268	< 0.0001	7.13009	7.01326	-0.116832
	VDR	0.1766	0.09446 to 0.2564	0.03119	< 0.0001	10.7028	11.0593	0.356463
	MMP13	0.1502	0.06750 to 0.2309	0.02256	0.0004	6.28383	9.39923	3.11541
	HECW2	0.1362	0.05327 to 0.2173	0.01855	0.0014	5.73253	4.86506	-0.867472
	ST14	0.1335	0.05054 to 0.2147	0.01783	0.0017	9.28684	9.16977	-0.117071
	CYP1B1	0.1059	0.02256 to 0.1878	0.01122	0.0129	9.61919	10.5286	0.909429
	CDH11	0.09798	0.01455 to 0.1801	0.0096	0.0214	13.8374	13.5507	-0.28677
	NR5A2	0.08447	0.0009297 to 0.1668	0.007136	0.0475	4.88164	4.52092	-0.360721
	CCNG1	0.08035	-0.003219 to 0.1628	0.006457	0.0594	11.0767	10.3999	-0.676739
	PSAP	0.0664	-0.01724 to 0.1491	0.00441	0.1195	12.9569	13.5416	0.584654
	LDLR	0.05281	-0.03088 to 0.1358	0.002789	0.2159	6.75232	6.20441	-0.54791
	ADORA2B	0.04686	-0.03684 to 0.1299	0.002196	0.2722	12.9976	12.6955	-0.302057
	CRISP2	0.01773	-0.06592 to 0.1011	0.0003144	0.6779	4.63448	3.42767	-1.2068
	VEGFC	0.01243	-0.07119 to 0.09589	0.0001546	0.7709	13.6311	13.715	0.083969
	CFTR	-0.001316	-0.08486 to 0.08224	1.731e-06	0.9754	2.42509	2.44226	0.0171747
	ROR1	-0.00866	-0.09214 to 0.07495	7.5e-05	0.8393	10.2005	10.3028	0.102303
	SEMA6A	-0.02037	-0.1037 to 0.06328	0.0004151	0.6332	2.69343	2.7423	0.0488724
	FOXO1	-0.02816	-0.1114 to 0.05553	0.0007928	0.5095	10.1183	10.094	-0.024334
	PPARG	-0.05844	-0.1413 to 0.02524	0.003415	0.1707	12.681	13.5687	0.887757
	PAX3	-0.08046	-0.1629 to 0.003115	0.006473	0.0591	2.28997	2.30275	0.0127788
	FZD7	-0.1459	-0.2267 to -0.06311	0.02128	0.0006	6.85607	7.01574	0.159673
	EDNRA	-0.1462	-0.2270 to -0.06347	0.02139	0.0006	2.42695	2.82305	0.396096
	EYA4	-0.1701	-0.2501 to -0.08784	0.02895	< 0.0001	7.37144	6.06994	-1.3015
hsa-miR-944	MTOR	0.2329	0.1523 to 0.3104	0.05422	< 0.0001	10.4432	10.2172	-0.226009
	TGFB1	0.04583	-0.03786 to 0.1289	0.002101	0.2828	9.4501	9.40212	-0.04798
