# Supplementary material for: Androgen-Responsive Oncogenic lncRNA RP11-1023L17.1 Enhances c-Myc Protein Stability in Prostate Cancer
Source: Int J Mol Sci. 2022 Oct 13;23(20):12219. doi: 10.3390/ijms232012219 (PMC9603324; doi:10.3390/ijms232012219)
Supplement: Supplementary file 1 [file ijms-23-12219-s001.zip › Table S5.xlsx]

## Sheet: Table S3.
Table S5. Differentially expressed genes in RP11-1023L17.1 knockdown microarray analysis
Fold-Change cut-off: 2.0 P-value cut-off: 0.05 compare: si-NC_VS_si-RP11-1023L17.1
Probe ID	GeneSymbol	Normalized signal (log2) of si-NC	Normalized signal (log2) of si-RP11-1023L17.1
A_24_P66027	APOBEC3B	10.7157	9.30691
A_24_P835500	ITPRIPL2	11.0542	12.1273
A_23_P203819	GOLGA3	12.345	13.7942
A_32_P103558	STON2	5.95168	7.90112
A_24_P530900	NA	3.93537	5.82864
A_24_P151920	TMEM97	10.266	9.14633
A_32_P188888	lnc-XRCC6-1	3.98686	5.44392
A_23_P135381	SP5	9.81926	7.41472
A_32_P149011	NA	7.45001	5.39974
A_23_P204947	GJB2	7.9689	6.69801
A_24_P624263	lnc-ADA-1	5.81004	8.13905
A_23_P60811	PRKAA2	5.23652	6.48405
A_23_P48414	CCNA1	7.50943	6.41316
A_32_P430743	lnc-DET1-1	2.5814	5.90469
A_23_P369815	FASLG	4.47292	6.084
A_24_P11900	MYH15	5.41242	6.71125
A_23_P335143	NA	3.98472	4.98891
A_32_P93996	LOC100128361	6.36293	4.15817
A_23_P384825	SLC25A5-AS1	3.71352	5.82721
A_23_P39454	ZNF556	3.16467	5.24786
A_23_P124384	SHOX2	5.88382	7.2567
A_23_P93722	SDK1	5.85767	6.87147
A_24_P710866	OPA3	4.01127	5.78638
A_32_P105397	SLC16A7	8.02006	6.56788
A_32_P18838	NA	4.68284	6.30505
A_23_P163099	POLE2	10.9038	9.84065
A_24_P124550	CCND1	13.4405	11.9632
A_23_P367071	UBE2DNL	4.87352	6.91332
A_23_P99452	BRCA2	6.98969	5.70472
A_23_P98900	CCDC92	11.3824	12.4554
A_23_P355075	CENPN	9.37968	8.04805
A_32_P79103	NA	5.17137	6.42227
A_24_P28657	AHCTF1	10.832	9.44422
A_23_P202156	NFKB2	7.86734	6.68719
A_23_P416766	NOL4	2.89534	5.74256
A_24_P263937	CCDC23	10.5653	11.942
A_23_P134454	CAV1	14.5111	13.195
A_23_P257763	BOC	2.69393	5.49826
A_32_P155721	NA	4.68837	5.83197
A_23_P106773	SULT1A2	7.68601	8.91523
A_23_P52109	PRKAA2	4.59869	6.15984
A_23_P402287	LNX2	9.58609	8.53459
A_32_P58029	NA	5.16084	7.50063
A_23_P214432	NA	3.89303	5.65704
A_23_P137434	RNF11	13.7703	12.3433
A_23_P109269	LAMA5	11.3602	10.3005
A_24_P284584	ZNF559	6.98871	8.02027
A_23_P22854	PGPEP1	4.72986	7.02579
A_23_P64854	KRT75	7.93651	6.92714
A_24_P173790	DUSP5P1	2.59619	4.9004
A_32_P140220	NA	3.79267	7.91101
A_23_P94494	TLE4	6.69458	7.8496
A_23_P367420	ADAM21	7.42617	5.96297
A_23_P81219	PLAC8	8.50236	9.72303
A_23_P68138	NA	2.70883	5.00105
A_24_P396167	CTSW	7.44579	5.05385
A_23_P58321	CCNA2	10.732	9.09399
A_32_P43372	NA	3.86415	6.03246
A_32_P69492	POLH	8.62529	7.42316
A_23_P408996	MBOAT1	9.49808	7.27709
A_23_P73297	MAGI1	6.7892	7.98103
A_23_P83351	DFNB31	5.63325	6.92883
A_23_P206454	CENPBD1	8.70397	10.2382
A_23_P330419	ACPT	2.59821	6.1102
A_24_P192556	TOR2A	4.47807	5.67561
A_23_P328836	LCOR	7.26538	8.45319
A_32_P73217	TMEM167B	9.15786	7.66998
A_24_P944437	ARID5B	7.47332	9.17587
A_24_P762767	NA	5.75896	6.86669
A_23_P35597	C10orf10	5.2066	6.85594
A_23_P397978	TCAF2	6.1713	8.00148
A_24_P388190	KCNK3	3.49106	5.18519
A_32_P211708	FZD3	8.13736	6.94869
A_32_P226907	MIR497HG	6.07777	7.2941
A_23_P7397	PCDHB10	6.33925	7.48825
A_32_P216635	KSR2	7.42639	9.01985
A_23_P159893	CHRDL1	2.60667	4.79043
A_23_P126313	ADCY10	2.61568	5.92138
A_23_P42112	GPR31	2.64706	4.98919
A_32_P127339	NA	6.54382	5.01605
A_24_P332711	NA	4.15194	5.41342
A_23_P108265	OR7C2	6.30846	7.94906
A_24_P912925	PLK4	6.66521	5.29321
A_23_P210869	COX4I2	2.64918	5.42937
A_23_P28153	SCLY	8.35422	6.86697
A_23_P107116	RNF112	5.05739	6.38836
A_23_P216920	NEK6	11.2431	12.7465
A_23_P206441	FANCA	9.3282	7.86356
A_24_P73730	CCDC113	6.85846	7.99985
A_24_P358305	NA	5.73805	8.32379
A_23_P51085	SPC25	11.8458	10.5148
A_32_P148122	NA	7.39717	8.65714
A_23_P23303	EXO1	10.7096	9.38454
A_23_P82738	RAD54B	11.5357	10.3179
A_23_P207905	SECTM1	8.61947	7.31527
A_23_P309837	STON2	4.10471	5.51146
A_32_P115277	NA	8.05313	6.65563
A_23_P69738	RASL11B	5.53197	3.98878
A_23_P92569	WWC2	9.9349	8.79336
A_23_P115785	FANK1	6.25996	7.95961
A_23_P111657	SHH	6.44751	4.79641
A_23_P59960	CRISPLD1	8.28957	6.92746
A_24_P150791	JPH3	5.36797	4.33048
A_23_P501754	CSF3	5.39216	4.01394
A_24_P397107	CDC25A	10.7674	9.06122
A_23_P253524	CENPE	11.4959	10.2364
A_23_P71530	TNFRSF11B	5.27499	6.35152
A_23_P4179	lnc-ANKRD40-1	5.44628	3.52496
A_23_P156390	JAKMIP2	5.5766	6.61024
A_32_P201564	CD300E	5.88114	2.5782
A_23_P10385	DTL	12.2895	10.7849
A_24_P193624	ZNRF1	9.20107	10.446
A_23_P18078	RARRES1	4.20643	6.17384
A_24_P356218	ARL6IP1	14.1977	11.9294
A_32_P33213	NA	8.06426	9.44251
A_24_P911766	NA	5.43549	3.72678
A_23_P145957	TPK1	10.6955	8.97593
A_32_P85539	HCFC2	9.78365	8.15891
A_23_P104188	ELF3	9.44342	10.7815
A_24_P935276	ZNF766	8.88142	10.0144
A_23_P207400	BRCA1	10.0256	8.29541
A_24_P114255	MBOAT2	10.0601	8.93401
A_32_P170454	HRK	5.63572	7.05598
A_24_P418250	LINC00086	6.84057	8.73774
A_32_P810645	FLJ40288	5.2836	2.58785
A_32_P47643	FAM110C	8.96325	7.83518
A_24_P409230	OR10A2	2.60118	5.19376
A_23_P170581	ZNF778	8.36139	7.10797
A_23_P132654	TLR9	7.31037	5.42424
A_23_P148175	FRMD4B	3.10529	4.85968
A_23_P422204	DESI2	7.73171	6.04634
A_23_P96369	CXorf57	6.41802	4.80762
A_32_P109794	STYX	12.0629	10.2883
A_23_P214411	GLO1	10.3205	9.20235
A_23_P129433	SLC9A5	9.64512	10.7877
A_24_P109101	TMPRSS11A	5.80339	2.74488
A_24_P892464	NA	2.57602	5.2233
A_24_P114334	RMND5A	10.8792	9.65531
A_23_P63896	FAS	8.55872	7.23477
A_32_P218228	FAM109B	4.85854	5.96666
A_32_P3214	GXYLT2	10.154	11.5566
A_24_P289366	CERS6	8.52226	7.39525
A_23_P210100	CYP26B1	7.22848	4.6741
A_23_P84929	SLC38A5	5.19844	6.33551
A_24_P344711	AGPAT3	12.3034	11.0842
A_23_P216812	CDKN2B	4.88615	5.90191
A_32_P124773	NA	7.12173	5.96866
A_24_P99090	CKAP2	6.69718	4.9444
A_23_P68773	CECR1	2.84378	4.95479
A_23_P142447	MYO1F	7.14828	8.8855
A_23_P74278	PDE4B	7.75082	6.73158
A_23_P25019	PRIM1	11.2138	10.1546
A_24_P83922	SNRPC	4.5195	5.84475
A_23_P215341	FKBP14	10.536	11.7485
A_23_P204941	GJB2	7.21816	5.75635
A_23_P133174	TMEM165	12.3112	13.3208
A_23_P66948	GAREM	8.50148	9.8707
A_23_P392544	NA	3.69761	5.31757
A_24_P944741	LRP2BP	2.87785	5.42147
A_23_P353726	CACUL1	7.7987	6.74223
A_24_P590317	NA	6.39664	7.45669
A_32_P233834	NA	7.14413	8.62822
A_24_P256692	MIA3	7.84995	8.97951
A_24_P294408	PLA1A	6.96241	8.40309
A_32_P199529	NA	3.38739	4.96617
A_23_P80759	PVRL3	9.81714	8.71936
A_23_P150818	MBD6	11.1112	12.391
A_23_P390032	SLC35G1	6.97144	5.62007
A_24_P261691	HIST4H4	5.52488	4.39293
A_23_P57277	MAP3K7CL	4.35755	5.69201
A_23_P394246	HCAR1	11.7659	12.7709
A_32_P32789	NA	2.60033	5.33951
A_24_P5750	KLK2	4.34168	6.5432
A_23_P103361	LCK	7.35314	6.02333
A_23_P51587	RGS7	4.54102	5.75993
A_24_P814749	LOC102723465	5.36716	6.53356
A_23_P113005	EFNA1	9.55946	10.9185
A_24_P67280	CTAGE15	6.99622	8.31302
A_24_P393312	KIRREL	10.5999	11.8695
A_23_P70328	CENPQ	10.5413	9.29375
A_23_P155514	AHSG	3.43794	5.40114
A_24_P57611	TMEM35	2.6016	6.07301
A_23_P341418	ZDHHC20	13.0182	11.3619
A_24_P918441	LOC401320	6.56041	7.58974
A_32_P234294	NA	6.04176	7.23671
A_23_P125265	KPNA2	16.3461	15.0655
A_24_P54178	TMED5	12.0616	10.8765
A_23_P8363	LINC00525	7.2656	8.73332
A_24_P319613	NEK2	8.42651	6.89872
A_23_P90804	MAP4K4	10.2698	11.4308
A_23_P148768	F5	5.40918	4.20612
A_32_P23187	NA	2.5586	5.37379
A_24_P880043	PCGF5	8.94342	7.21096
A_23_P160537	AUNIP	10.8812	9.73325
A_23_P138507	CDK1	13.9706	12.4696
A_32_P85273	GOLGA8R	8.0595	9.24454
A_23_P373819	TUSC1	11.7492	10.739
A_23_P303671	ECM2	4.70205	6.32172
A_23_P417383	ASPRV1	6.81405	8.24567
A_24_P202857	SPTLC3	7.46154	8.58501
A_24_P713267	SLCO1B7	2.88087	5.19844
A_23_P58706	SPINK13	8.9032	9.91844
A_23_P417261	EFHB	5.06186	6.32243
A_24_P761705	NA	2.86349	4.88085
A_23_P65320	NEK3	7.51267	5.99113
A_23_P367816	SNX29	8.75962	9.84679
A_23_P252740	DSCC1	10.9053	9.35706
A_23_P162719	DIAPH3	8.82747	7.54928
A_23_P865	FRRS1	7.11953	8.12921
A_32_P127812	NA	7.20043	6.05061
A_24_P140788	FGD2	5.98803	4.86305
A_23_P390343	DHX40	6.58711	7.70741
A_23_P433785	P2RX5	7.09406	5.58744
A_24_P8524	NA	5.3185	6.40927
A_32_P9753	VMP1	7.73767	9.2426
A_23_P406616	CCDC71L	11.2658	12.5558
A_24_P555714	NA	6.71825	7.73815
A_24_P280497	FBRSL1	14.176	12.2799
A_24_P631948	NA	6.0394	7.37486
A_23_P69637	OTUD4	6.41027	5.37751
A_23_P24987	TSPAN31	8.24237	9.96521
A_23_P54100	ESR2	4.61625	6.33474
A_24_P206776	CRYAB	6.6819	7.8524
A_24_P50328	NA	7.68179	5.78546
A_23_P16915	QPCT	3.34713	5.43842
A_23_P17190	KLHL41	5.60268	8.45583
A_23_P91104	KCNK3	3.3853	5.19076
A_32_P221590	NA	8.18156	9.5708
A_23_P215997	CYP11B2	2.7056	4.96388
A_24_P29733	CDK14	7.40843	9.97065
A_32_P218823	NA	5.36855	7.15831
A_24_P450092	GATA2-AS1	6.68249	7.71492
A_23_P54357	LDHAL6B	3.19837	5.05632
A_23_P48669	CDKN3	14.5348	13.3553
A_32_P153244	C3orf14	6.39418	5.34778
A_23_P6481	TNRC6B	10.3055	11.3339
A_23_P45294	FAM199X	11.8809	10.5269
A_24_P204614	FOXD4	3.59714	5.1626
A_23_P18213	DNAH1	2.56727	6.57556
A_24_P929650	NA	12.0674	10.6781
A_23_P159839	C1GALT1C1	11.8876	13.0956
A_23_P170491	TRAIP	12.6621	11.5528
A_32_P119569	GOLGA8EP	6.41204	7.66716
A_32_P47265	SAMD12	7.97484	6.73806
A_32_P170444	SUB1	11.1812	8.99073
A_24_P313504	PLK1	14.5614	12.7071
A_24_P659980	NA	5.54418	6.55872
A_23_P46660	NA	4.50068	6.57201
A_32_P174693	C1orf234	4.03815	5.15508
A_24_P257099	HJURP	10.2165	8.46307
A_24_P932648	KDM4B	7.03953	9.24049
A_23_P58031	MAP3K13	7.61545	9.16643
A_23_P395404	FGF20	4.04077	6.00529
A_24_P160202	PANX2	6.78703	5.59077
A_23_P419156	OPN1SW	2.55041	5.84618
A_23_P113623	MRPL45	12.9995	11.6158
A_32_P171903	B4GALT1-AS1	3.51454	5.22448
A_23_P209799	MYO7B	7.67224	6.49707
A_23_P98898	CDK2	8.18749	6.97277
A_24_P160680	CCDC40	4.37811	5.65449
A_23_P136817	KNTC1	11.2314	10.1083
A_23_P200930	MTR	12.4551	10.9897
A_23_P256956	KIF20A	10.8284	9.16219
A_23_P389588	TCF7L2	5.30247	6.49665
A_23_P133916	C2	3.65062	5.6569
A_23_P159865	UPRT	7.2956	8.3918
A_24_P92381	NA	5.95761	4.84996
A_32_P41698	NA	5.90411	2.90282
A_24_P942177	lnc-LIX1-1	6.49825	5.09954
A_32_P36292	NA	8.70567	10.3501
A_24_P270728	NUPR1	12.8866	14.7702
A_23_P127948	ADM	12.0429	13.7574
A_23_P57089	PMEPA1	10.3875	11.432
A_23_P396299	MRVI1-AS1	4.79457	6.9008
A_24_P148717	CCR1	4.47674	7.64577
A_24_P349466	PRR13	5.89335	7.35728
A_32_P37875	NA	4.50563	6.31199
A_23_P48570	DHRS2	10.6006	9.57319
A_32_P166152	NA	5.6644	6.70904
A_32_P23810	lnc-GGCT-1	4.40112	6.88119
A_24_P179489	SDCCAG8	6.93797	8.69857
A_23_P34852	CTRC	4.14414	5.86465
A_24_P280846	GOLT1A	7.51775	8.68221
A_23_P71117	SLC25A40	8.14841	7.13528
A_23_P133656	LAMA4	8.81668	10.3417
A_32_P213210	NA	8.8675	10.0583
A_23_P34835	LMNA	14.8253	15.9331
A_23_P101642	PTPRH	9.88456	11.4837
A_24_P375586	NA	3.07671	5.3032
A_23_P201790	PPP1R12B	9.28298	10.4001
A_23_P71989	UPP1	8.01606	9.64268
A_32_P96692	POLH	8.75502	6.80027
A_23_P357717	TCL1A	2.71038	5.90665
A_24_P556937	NA	5.12172	3.68452
A_24_P384099	ZNF775	11.8375	9.59562
A_24_P929695	NA	4.77939	6.87628
A_24_P237389	EIF1AX	11.9694	10.7362
A_23_P400036	NA	2.92884	4.81088
A_23_P146077	ZNF395	12.5137	13.6311
A_24_P16071	NA	7.7721	9.37206
A_32_P96752	NA	11.7607	13.1983
A_24_P289865	NA	5.25607	6.43249
A_24_P312164	SLC25A40	8.20186	6.77993
A_32_P118655	LOC101928588	5.1113	6.3244
A_24_P67494	NA	9.38863	7.89553
A_24_P229807	NA	5.99596	7.08166
A_23_P136595	NA	5.44527	7.5369
A_24_P753110	NA	2.58298	5.40327
A_32_P224253	DNAH11	6.71414	7.7388
A_23_P94501	ANXA1	14.4206	15.5106
A_23_P60166	DEPTOR	5.55075	6.60976
A_23_P33154	STAU2	10.0228	8.34123
A_23_P48029	CLEC4A	4.69266	6.69699
A_24_P281194	TRIM72	4.98703	6.66982
A_24_P225448	CSRP1	8.6175	7.5541
A_32_P97192	NA	8.67345	7.63818
A_23_P144684	ANKRD32	9.84964	8.42092
A_32_P152696	NA	12.9306	11.6839
A_32_P150449	NA	7.7433	8.87444
A_23_P142304	MKNK2	9.28187	10.7316
A_23_P8241	FBXO5	10.9789	9.86495
A_23_P1691	MMP1	10.9006	11.9261
A_32_P41594	NA	9.10722	10.4006
A_32_P6233	NA	6.29126	7.35259
A_32_P148345	ANXA2	7.93079	9.15216
A_23_P303101	PCDHGC4	5.57579	4.0819
A_23_P37127	FOXA1	11.9275	13.2676
A_23_P123010	BCL7B	6.94711	7.97596
A_23_P200303	HHLA3	5.50905	7.24437
A_32_P425998	IGFN1	3.2613	6.27021
A_23_P421664	CAP2	10.7218	9.44108
A_24_P535483	LINC00176	10.8467	8.5743
A_24_P113144	ATAD5	7.1578	6.12079
A_23_P64173	CARD16	6.77492	4.21063
A_23_P92222	MUC20	7.33567	9.26885
A_32_P162862	NA	5.61716	7.02232
A_32_P183970	C15orf62	5.91315	4.63541
A_23_P254790	TAF9B	7.86668	6.11719
A_23_P150009	ZDHHC16	9.94835	11.2844
A_32_P104619	LOC727820	8.08281	9.08702
A_23_P357374	PTH2	8.70434	6.58711
A_24_P33525	NA	7.70061	9.06373
A_23_P107653	ETFB	14.4481	15.7595
A_23_P201264	NMNAT1	8.06588	6.98487
A_24_P195253	HSPA14	5.49371	3.49049
A_23_P360340	UACA	10.04	11.1641
A_24_P291231	PER3	6.04221	4.97281
A_23_P384816	SLC45A4	7.41547	6.34596
A_32_P226678	LINC00672	4.62339	5.70025
A_23_P83073	HIATL1	10.3734	9.24808
A_23_P48513	IFI27	10.4347	11.5867
A_23_P170719	NA	7.8131	10.0042
A_24_P89426	APOM	7.48531	8.68107
A_32_P198791	NA	5.32771	6.5704
A_23_P388681	ELAVL1	9.98635	8.92481
A_23_P161474	MCM10	9.292	7.92199
A_32_P37592	SCARNA17	9.19462	7.47057
A_32_P76576	LOC102725477	7.976	6.96297
A_23_P155979	EGF	6.22542	5.11259
A_24_P417460	SFMBT2	3.85421	5.07381
A_23_P110851	TERT	7.91915	6.51197
A_23_P52017	ASPM	12.4471	10.6223
A_23_P364504	FAM132B	9.54778	8.10622
A_23_P14892	IGFALS	3.81138	5.4078
A_24_P237912	TCAF2	4.83729	7.04979
A_24_P910297	GOLGA2	7.3469	9.25218
A_23_P218827	POLQ	10.571	8.86765
A_32_P140262	NA	10.9598	9.5813
A_32_P224234	LOC645195	5.53412	6.57484
A_24_P914095	NA	3.1825	4.98459
A_24_P333052	NA	5.58085	7.48338
A_32_P46594	LOC145837	3.56437	5.05148
A_23_P1775	DPAGT1	11.0938	9.57767
A_23_P397347	MCM9	7.64666	6.40497
A_32_P46840	LOC729680	9.42854	8.17541
A_23_P215060	PODXL	13.689	15.0291
A_24_P271363	CDS2	10.1196	11.2411
A_24_P683829	NA	7.11214	8.27925
A_23_P205885	ZSCAN2	2.94522	4.89451
A_23_P374216	WFDC11	2.94904	5.189
A_24_P510377	NA	5.08037	6.81973
A_23_P84350	MCPH1	5.22284	6.33595
A_24_P103803	B4GALT1	12.1838	13.3468
A_23_P80827	FYTTD1	11.9302	10.6855
A_32_P57465	FPGS	7.12685	8.38872
A_23_P145485	ULBP2	7.82313	9.01191
A_24_P41415	NA	2.66633	5.69447
A_24_P159323	GINS3	7.56202	6.13876
A_32_P34941	NA	6.93754	5.88382
A_23_P105583	RHNO1	9.57833	7.61545
A_23_P206110	CYP1A2	10.1745	11.222
A_24_P76313	FAM43B	10.2458	11.4507
A_24_P565540	NA	2.54626	4.73073
A_23_P40956	GHRL	4.46408	5.51972
A_23_P92410	CASP3	12.8404	10.9294
A_23_P370682	BATF2	7.45396	8.66305
A_23_P312863	TUBB4B	12.4648	11.3849
A_24_P213134	NA	9.67796	11.8768
A_32_P194563	NA	9.08034	7.16476
A_23_P165521	STRN	5.27074	4.1053
A_23_P128263	PRB1	5.55253	8.21187
A_23_P80817	TAGLN3	7.30936	5.88729
A_23_P120883	HMOX1	11.7337	12.8241
A_23_P86660	HNRNPA3	11.1584	9.69939
A_23_P388433	C4orf3	12.5877	14.7274
A_24_P127312	NA	8.70778	9.954
A_24_P925516	NA	5.23545	4.12295
A_32_P32463	NA	8.36808	7.22848
A_23_P5903	SLCO4A1	14.0162	12.725
A_24_P280897	NA	9.86114	11.6331
A_23_P18579	PTTG2	13.6703	12.4611
A_32_P114028	CCDC7	5.15406	6.86262
A_32_P192480	MBNL3	7.10331	5.53595
A_24_P878992	NA	9.49421	10.966
A_23_P420442	SEMA6D	7.04584	8.92422
A_24_P799048	LINC01540	8.87365	10.7297
A_23_P25581	LIG4	5.81323	4.76709
A_24_P61464	ABHD13	6.36431	4.96716
A_23_P37111	DICER1	10.1636	9.15281
A_32_P59277	NA	8.03225	9.34361
A_23_P141055	TGFB1I1	9.11006	7.65952
A_32_P119007	ESPL1	5.84762	2.49519
A_32_P2452	TMTC1	11.0682	10.0138
A_23_P42595	NA	2.59474	5.57287
A_24_P661641	LINC00938	7.83848	8.84776
A_32_P83453	NA	13.5081	14.5581
A_23_P345445	LGALS8-AS1	4.08632	5.10392
A_32_P3408	NA	6.08057	7.3945
A_24_P409985	TMEM44	6.92894	5.90718
A_23_P358628	DPY19L1	10.2441	9.12434
A_23_P393015	MYL10	7.91562	6.70941
A_32_P5205	LOC101927172	4.42463	6.70292
A_32_P77343	NA	9.41851	8.25475
A_23_P254768	HCG4	8.28427	9.66456
A_23_P40453	CBR3	11.4739	10.4644
A_23_P53193	SYTL2	10.28	12.0292
A_24_P590241	NA	5.31437	6.33642
A_24_P247536	FAM133B	5.88729	8.03534
A_24_P248345	OLFML2B	4.50363	5.53318
A_23_P397341	PAQR4	8.10961	6.45891
A_32_P39431	lnc-COL9A2-1	7.59816	8.712
A_24_P12573	CCL26	9.08347	10.4339
A_24_P935535	NA	6.69577	7.86501
A_24_P251841	SETD7	7.82468	9.27226
A_24_P391987	C4orf3	10.6329	12.9858
A_23_P93690	MCM7	15.8957	14.8712
A_23_P32021	FANCC	9.5459	8.14755
A_24_P803885	lnc-SCCPDH-1	8.2581	9.65452
A_24_P294703	PRRC1	9.99013	11.0856
A_23_P49878	FAM64A	12.8244	10.908
A_24_P924183	MYO10	6.42517	4.39163
A_32_P68773	NA	3.90146	6.16423
A_23_P30411	NA	5.41154	6.47926
A_24_P702871	NA	3.60317	4.94738
A_24_P14260	CARD8	8.23278	7.09673
A_23_P216622	FKTN	6.65992	5.28758
A_32_P154361	B3GALT1	9.91862	11.2774
A_32_P50223	PLK5	3.41257	5.63325
A_24_P456422	NA	3.52672	5.47809
A_23_P150667	KIF18A	9.65195	8.35883
A_32_P107859	NA	5.72711	7.21212
A_24_P46130	ACPP	3.25836	6.31267
A_32_P27135	NA	5.56929	4.5295
A_23_P208870	AKT2	10.5136	9.00116
A_23_P361569	SLC35F5	10.6062	9.52847
A_24_P698125	GLDN	3.13093	5.08099
A_24_P293114	SPTBN4	5.30179	6.52997
A_23_P61050	MLKL	11.2485	10.1831
A_24_P366768	NA	6.2245	7.52558
A_23_P256470	NPY	2.53823	4.90342
A_23_P40039	AMMECR1L	11.907	10.4394
A_23_P502336	EMR2	5.33672	4.08217
A_23_P142849	RND3	12.2311	14.476
A_24_P40737	PRLR	4.2069	6.44328
A_23_P71727	CKS2	14.3949	13.1587
A_24_P238786	NA	2.8484	5.64248
A_23_P143535	WDR4	9.30787	10.3489
A_24_P765569	NA	4.37383	6.59129
A_23_P426398	PGAM5	8.42352	6.59945
A_24_P938135	NA	9.249	10.5166
A_32_P166540	NA	6.87082	7.93046
A_32_P205895	NA	4.36268	5.57414
A_32_P151800	FAM72D	11.0941	9.79433
A_24_P360722	DIP2C	7.35259	8.81975
A_24_P217063	DNAJC10	6.15964	4.63396
A_32_P95672	NA	5.64979	4.61263
A_24_P186664	NA	5.08883	6.17802
A_23_P213592	RNF44	10.984	12.0967
A_23_P384329	DENND4A	4.14042	6.66509
A_24_P212864	NA	11.3405	12.3462
A_24_P373297	ZDHHC7	12.0614	13.2108
A_23_P165372	GALNT13	2.69209	5.42206
A_23_P115202	CRNN	2.61056	5.2068
A_24_P166443	HLA-DPB1	2.50843	4.94311
A_23_P146274	STMN2	3.91176	5.16781
A_24_P935839	GRIK2	4.19005	6.15308
A_23_P217596	USP12	12.3862	10.4743
A_24_P277576	TRIP13	8.47548	6.82556
A_32_P145989	PRDM15	5.06005	7.4129
A_23_P400078	MTHFR	7.365	8.73234
A_24_P15980	NA	5.47011	3.81904
A_32_P67904	SYT15	4.4361	6.36683
A_23_P317001	BNIP2	11.5575	10.2321
A_24_P923449	NA	3.6829	4.90244
A_23_P72503	KLHL2	9.35748	8.33566
A_23_P382607	WNT4	7.72848	6.64974
A_24_P857404	MEX3A	11.7611	13.2226
A_23_P78742	FLT3LG	6.42708	7.79676
A_23_P429184	GNPNAT1	13.1682	11.4364
A_24_P185986	UPRT	10.8102	11.8716
A_23_P99559	PAPOLA	10.1083	8.87314
A_24_P24565	NA	2.77734	4.69223
A_32_P123743	KCNQ1OT1	11.1499	12.4868
A_32_P30760	NA	8.34784	9.62139
A_23_P32165	LHX2	9.53289	7.76244
A_23_P420209	GCNT3	3.81094	4.82978
A_23_P68486	FAM210B	12.1372	13.9926
A_32_P30477	NA	6.10015	9.10963
A_23_P120325	KIF3C	11.0217	12.434
A_24_P157156	CCDC150	7.31387	6.12197
A_23_P250035	SDHA	10.9284	9.45703
A_32_P116957	NA	7.68511	6.61329
A_23_P406227	SNAI3-AS1	7.88048	10.2358
A_24_P511877	EMBP1	7.34307	6.19583
A_32_P20717	NA	5.2022	6.30753
A_32_P60013	NA	3.64954	5.05
A_24_P902100	AGPS	8.19577	7.10439
A_23_P109034	SDC4	11.4453	13.1254
A_24_P166407	HIST1H4B	14.7217	13.3904
A_32_P18159	LYRM7	7.60193	6.58792
A_24_P380348	SMAP1	9.18917	8.18416
A_24_P629883	NA	4.61647	6.90753
A_24_P22163	DICER1	10.5774	9.23339
A_24_P376120	MYPN	4.4492	6.61781
A_24_P126262	BAGE4	5.36262	6.51776
A_24_P851522	LINC01111	7.43086	9.47121
A_23_P131825	TNNC2	5.80858	7.23896
A_32_P41080	LOC102724087	2.48468	5.38963
A_23_P346006	CCPG1	7.04752	8.66472
A_24_P826858	NA	8.00004	5.77521
A_23_P321261	ME2	9.87342	8.44775
A_23_P44053	NA	3.72174	5.40607
A_24_P126628	TMEM194A	10.1633	8.84762
A_32_P193770	C4orf47	6.85745	8.16114
A_24_P497318	LOC100129973	5.14359	6.24941
A_24_P863580	NA	5.59141	4.03889
A_24_P917819	ANKRD30BP2	8.76582	10.0765
A_32_P3742	RFX3	5.94417	4.75023
A_23_P87379	PDE2A	4.55995	6.09658
A_23_P371824	TUFT1	11.5301	13.2265
A_23_P333063	SMARCE1	7.36442	8.56294
A_23_P57306	CHAF1B	12.2227	10.9799
A_23_P21260	NA	4.15447	6.8758
A_23_P119337	ATF5	10.8409	9.35132
A_23_P167408	NA	5.4338	4.2758
A_23_P143981	FBLN2	3.87813	5.11808
A_23_P384418	GAGE3	5.6329	2.95351
A_24_P262728	SH2D3A	7.8548	6.41574
A_24_P928557	NA	5.45588	4.19556
A_32_P18357	LOC101927178	5.19882	6.4357
A_23_P136909	HMGN5	9.23567	7.09088
A_24_P758926	NA	5.49797	4.48637
A_24_P916614	PTBP3	12.1783	11.0148
A_24_P76512	NA	8.77872	10.3424
A_24_P474188	NA	6.60351	4.61962
A_23_P149813	RSU1	5.16852	4.14048
A_23_P94782	CAPN8	2.84292	4.8119
A_32_P18448	TAF1A-AS1	6.38194	7.49241
A_23_P160336	LEFTY1	5.44567	7.6694
A_24_P941167	APOL6	7.80652	6.57061
A_32_P192389	NA	2.95291	5.43867
A_23_P428298	UNC5CL	4.31697	5.61612
A_24_P694738	SNHG17	6.02641	4.85485
A_32_P55438	NA	4.89451	6.52542
A_24_P392842	NA	4.765	6.07378
A_32_P224666	CAPZA2	6.35803	7.38595
A_32_P99690	NLN	6.58941	5.54567
A_23_P58328	ANXA10	7.97953	10.5041
A_32_P149753	NA	6.14637	5.00163
A_23_P52676	CATSPER1	8.05329	6.71262
A_23_P51126	IL1RL1	7.5084	9.8434
A_23_P251965	NA	7.44632	5.25068
A_24_P942481	GPR180	9.08937	7.77276
A_23_P6447	IFT27	10.0321	11.7611
A_23_P351204	KCNQ2	5.42503	2.6224
A_23_P205531	RNASE4	7.9476	9.85946
A_24_P930062	CXXC5	9.09878	8.05313
A_23_P38328	DBF4B	8.46817	7.19771
A_24_P97526	CMTM6	11.2264	10.1921
A_24_P649426	NA	2.98329	4.83928
A_24_P944928	NA	4.64538	6.29398
A_23_P404667	BIK	9.83112	10.9021
A_24_P214231	STIL	8.25837	6.87065
A_23_P500390	DONSON	12.1816	10.8069
A_32_P103678	TMEM150C	5.96432	4.18055
A_24_P89708	IMPDH1	10.0823	8.81487
A_23_P422193	SUV39H1	9.63359	8.41643
A_23_P91019	PRKRA	12.031	10.7717
A_32_P116176	NA	10.3914	2.79278
A_24_P45379	CACYBP	7.73035	6.20034
A_23_P410408	OR7D2	3.26811	4.85158
A_24_P89971	SURF4	10.1933	11.2138
A_23_P153917	MAP2	2.60486	5.28294
A_23_P152768	TUBG1	9.59187	8.5803
A_24_P37441	PDK1	11.6649	13.2982
A_24_P221968	LOC643802	4.29016	5.83856
A_23_P138294	MMEL1	2.84778	4.95542
A_32_P118348	HDAC9	6.27567	7.72177
A_32_P211141	LYRM7	11.809	10.3992
A_23_P6041	DEFB126	4.03734	5.60667
A_23_P140614	GOLGA8O	5.22658	6.41027
A_32_P79366	HABP4	8.3976	9.87489
A_23_P170464	RNF208	10.2717	7.72063
A_32_P74615	SP5	10.865	9.79079
A_32_P30831	RAD51-AS1	6.78478	7.82266
A_23_P106162	MIS18BP1	11.2823	10.1383
A_23_P108911	TRIM54	2.54898	5.01777
A_24_P942346	ECT2L	2.59712	4.91647
A_24_P139152	COL8A1	5.48598	7.88023
A_24_P306921	NA	5.96091	7.00882
A_23_P218068	PLEKHA5	10.181	8.65753
A_23_P254612	DBF4	10.5371	9.20405
A_24_P941572	FAM114A1	8.6501	10.0643
A_23_P209006	INSL3	8.71936	9.75205
A_23_P419254	DIAPH3	7.58228	6.18076
A_32_P6653	NA	6.57695	7.61206
A_23_P209760	AMMECR1L	5.40735	2.76411
A_24_P522976	NA	3.78908	4.81534
A_24_P727501	NA	9.55989	11.24
A_23_P16047	GPR4	10.1303	8.51487
A_24_P66578	NA	7.02866	8.50681
A_24_P912404	NA	6.6656	7.74824
A_23_P392928	TSPAN33	5.20759	3.97164
A_23_P203364	TMEM109	8.88265	7.756
A_32_P139021	NA	10.1796	8.48073
A_24_P228027	CYB5D2	7.87834	9.07614
A_24_P225862	PVRL3	7.06379	4.95612
A_23_P256487	CD274	8.3291	6.96746
A_24_P892353	NA	6.21552	8.22063
A_23_P76718	NEK3	9.61067	7.92821
A_23_P54460	SPRED1	9.9774	8.913
A_24_P686263	NA	5.95189	7.71054
A_32_P38242	UCHL5	6.01462	4.20941
A_23_P202978	CASP1	6.75862	4.84563
A_32_P150030	PPM1D	9.95148	8.92122
A_32_P154112	NA	6.90928	5.75355
A_24_P920483	NA	3.75242	5.93838
A_24_P501520	SLC25A51	7.92062	6.28314
A_23_P79622	FKBP7	8.74592	10.6332
A_24_P93452	NA	9.65496	11.1661
A_23_P211909	PLS1	9.81281	8.15423
A_24_P338409	C11orf21	5.74385	4.48419
A_24_P931944	PARVA	10.7929	9.64628
A_24_P258955	ZNF317	10.9616	11.9893
A_24_P136453	TNS1	5.19394	3.12082
A_23_P423480	TYSND1	10.4452	9.13485
A_32_P215556	TMEM161B-AS1	7.01474	9.59021
A_23_P111194	SPDEF	12.4143	11.3935
A_23_P358410	SRGAP3	4.21642	6.12449
A_23_P305470	PRM3	7.51634	6.43786
A_23_P87769	PARPBP	11.6079	10.5292
A_23_P20384	LSM1	13.4068	11.8446
A_24_P268196	LZIC	8.61626	7.55287
A_24_P357986	NA	4.68716	6.28905
A_32_P28704	NA	3.54545	5.14626
A_23_P40926	DGKG	2.73383	5.01833
A_24_P26496	NOTCH4	3.12415	4.76886
A_24_P96780	CENPF	8.41458	7.35765
A_23_P114656	HDAC1	13.7974	15.0845
A_23_P37914	SLC5A11	3.61371	4.72396
A_32_P152544	NA	5.86148	7.27503
A_23_P201837	MR1	6.98009	5.31477
A_24_P318544	CSNK1D	12.0705	11.0308
A_23_P7873	MCM3	14.3211	12.9525
A_32_P394951	NTN5	6.999	9.63424
A_23_P308581	RRP36	14.7354	13.0888
A_24_P281395	NA	8.47166	9.56398
A_32_P34881	LOC101929787	8.26052	9.77636
A_23_P47396	NA	7.94813	6.92569
A_24_P348090	ME2	10.1459	8.62423
A_23_P356494	SPINK5	2.69364	5.2587
A_32_P29965	MAGEA9	5.41871	2.52804
A_23_P71855	C5	8.70012	10.0324
A_32_P406142	NA	7.20243	8.82446
A_32_P15288	NA	7.31661	6.07758
A_23_P88331	DLGAP5	12.8927	11.1784
A_24_P678295	NA	5.5146	4.49078
A_23_P60016	PTTG3P	9.36498	8.22428
A_24_P639679	SNHG18	7.91732	9.00452
A_23_P212696	FSTL1	15.243	13.3807
A_24_P339974	AP2A2	8.41994	7.41784
A_24_P211558	PATZ1	7.07093	5.74792
A_23_P352426	CDRT1	5.19912	3.31316
A_24_P385739	EIF5A2	10.7344	9.3577
A_23_P255827	NA	6.65134	7.67558
A_23_P207557	HNF1B	5.42672	4.34555
A_32_P157504	NA	7.90619	10.0697
A_23_P42706	HOXA11	7.64175	6.56418
A_24_P293358	C2CD2	8.20919	10.2441
A_24_P484357	NA	3.66173	5.62752
A_32_P208078	MTHFR	8.83641	10.1487
A_32_P227921	CNKSR3	6.50614	7.75485
A_23_P349203	RNH1	6.34301	3.35451
A_24_P290999	NEAT1	7.49818	9.26939
A_32_P211045	DHFR	9.66121	8.27312
A_24_P465917	NA	5.29766	4.24218
A_24_P922127	LOC102725327	5.3498	3.85986
A_24_P118801	NA	3.71607	5.71724
A_23_P324304	ALK	3.46374	5.22961
A_23_P252501	NA	3.86065	4.86654
A_23_P12920	RAD9A	6.33178	5.18296
A_24_P778928	NA	10.8828	7.9545
A_32_P113736	GPR63	5.15018	2.67804
A_23_P329924	HCAR2	3.32279	5.46006
A_24_P943949	LRRC8B	5.7374	4.32135
A_32_P183656	NA	6.83491	8.06213
A_23_P257971	AKR1C1	8.0063	9.52894
A_23_P404902	SHROOM1	7.10223	6.00147
A_23_P127279	FAM35A	9.36309	10.3966
A_23_P364107	MIS18BP1	10.0841	8.71702
A_24_P144961	LOC646471	5.24066	2.51951
A_23_P31563	NA	5.31302	4.26367
A_24_P490109	NA	5.5539	8.0484
A_24_P817236	CHRM3	8.47886	9.94835
A_32_P223256	ZFPM2-AS1	4.80964	6.23622
A_32_P94122	NA	7.51397	8.5361
A_23_P256047	ANKEF1	7.9946	6.84682
A_23_P95683	CA5A	2.8819	5.75972
A_23_P91910	PLSCR4	9.21949	7.54909
A_23_P112026	IDO1	7.20157	9.61919
A_23_P414771	NA	14.0372	12.5398
A_23_P86171	FOXD2	8.65079	7.51339
A_23_P151046	KLRC1	5.34932	2.42877
A_23_P26976	CHAD	3.80231	5.20381
A_24_P911571	GNB5	7.3787	6.03271
A_24_P761386	NA	4.92003	5.96497
A_32_P87013	CXCL8	7.25468	6.2101
A_23_P351286	CD22	3.95624	6.21985
A_23_P203933	ITPR2	4.84344	6.23698
A_24_P410468	BRIP1	5.96537	4.24018
A_32_P60632	NA	7.44728	8.89769
A_24_P549553	TTC3	9.81893	11.5153
A_24_P217834	HIST1H3D	14.1438	12.5103
A_24_P277211	HRH1	8.88383	10.0736
A_23_P254271	TUBB6	14.503	12.4819
A_23_P130158	WNT3	10.0951	8.84161
A_24_P324449	ABCB10	9.12714	8.0017
A_23_P45185	FIGF	3.71755	5.17797
A_23_P413576	GALNT4	7.08031	8.42488
A_24_P599453	lnc-CHD1L-1	7.17811	8.56496
A_23_P120345	PELI1	7.09114	8.3941
A_24_P183150	CXCL3	7.8239	6.5753
A_32_P40999	NA	8.70636	9.75957
A_32_P78285	NA	10.4338	12.0215
A_32_P31785	NA	9.49226	8.42701
A_23_P40010	NA	5.21733	6.2547
A_23_P358709	AHRR	7.57726	6.52587
A_23_P74870	MROH9	5.54527	4.0524
A_32_P354945	LOC100505851	5.58067	3.58276
A_24_P296508	SLC43A2	7.81599	6.44794
A_23_P71492	NEFL	12.1386	13.7082
A_23_P353667	MIR7-3HG	4.40856	5.46235
A_32_P19840	lnc-EPHA1-1	12.8614	14.1779
A_23_P320054	WNT7B	9.03828	10.5653
A_23_P158041	AQP7	4.55405	5.72332
A_23_P214969	CITED2	10.6215	12.3528
A_24_P68991	NKX6-1	3.9497	4.98293
A_32_P100974	RPL24	11.0123	12.2606
A_23_P11862	C1orf112	11.2323	9.74981
A_23_P153571	IGFL2	3.59262	4.85905
A_23_P356667	CCDC83	2.63084	6.33051
A_24_P229531	NABP1	9.36761	10.5029
A_23_P205419	BRMS1L	10.0372	8.86725
A_24_P180830	CARD9	12.6187	11.4242
A_24_P235429	ABCA1	8.09224	10.2258
A_32_P35486	NA	7.12398	8.14666
A_32_P80338	NA	5.99999	4.97521
A_23_P101007	NOTUM	6.09565	4.90969
A_23_P128808	GPR132	5.36289	4.04902
A_24_P115450	BIN3	7.46516	8.52382
A_23_P35055	NPHS2	5.50802	7.24358
A_24_P913956	NA	10.7102	11.834
A_24_P120734	LINC00525	5.98172	7.18723
A_32_P128280	NA	5.58686	4.32916
A_23_P140654	NA	6.12045	7.75696
A_23_P371682	GPC6	4.08808	6.1228
A_24_P53778	ITLN2	3.37477	5.70948
A_23_P214876	JARID2	10.0022	11.0057
A_24_P389415	PNMA2	6.64606	5.00546
A_32_P185361	NA	8.34004	9.35748
A_32_P105578	NA	6.51092	5.34932
A_24_P382319	CEACAM1	8.88278	10.059
A_23_P159406	SPRR1B	5.21402	6.39811
A_32_P153589	XLOC_l2_012323	7.45604	5.64111
A_23_P332260	PBOV1	6.20132	5.1777
A_23_P119778	SLC39A10	8.4093	6.94163
A_23_P216630	SLC44A1	11.7502	10.2578
A_32_P31021	NA	6.67237	5.20456
A_23_P52278	KIF11	9.24643	7.99136
A_24_P23245	NDUFA6	12.7221	13.7284
A_24_P160424	HCG4B	5.4782	3.9452
A_23_P10127	SFRP1	5.039	3.75503
A_24_P255965	NA	7.91817	9.2134
A_24_P269184	DPCR1	2.9011	5.20926
A_24_P91852	DYNLT3	11.378	12.539
A_24_P921264	LOC101927027	9.53152	8.31579
A_24_P675386	C11orf58	10.4964	8.93366
A_24_P919789	NUCKS1	5.81497	3.1631
A_23_P71258	CYP3A43	5.56554	6.87654
A_24_P164071	NA	4.13425	5.21733
A_24_P225719	MOB4	11.5773	10.2272
A_24_P75920	CCDC159	5.88689	7.55777
A_32_P167883	NA	8.58518	9.73093
A_23_P140405	FOXN3	12.1977	13.4925
A_24_P244447	SHANK2-AS3	9.5713	8.47341
A_23_P102000	CXCR4	5.17864	8.02252
A_24_P392774	HSD17B12	7.48033	6.37778
A_32_P36973	LOC100507140	5.98087	7.91666
A_23_P141893	PPM1N	9.4877	10.5219
A_24_P154037	IRS2	8.39995	10.2298
A_23_P35219	NEK2	9.72878	8.43631
A_24_P283635	ADAMTSL1	4.06751	5.12591
A_24_P494425	NA	4.01363	7.3057
A_32_P233405	lnc-ASH1L-1	4.31731	5.50285
A_24_P186862	CHMP5	6.96887	8.03516
A_23_P80032	E2F1	11.1636	10.1188
A_23_P219013	ABCC10	8.23059	6.98871
A_24_P347447	DAAM1	10.6957	11.7158
A_24_P740857	NA	11.7784	12.7857
A_23_P216068	ATAD2	11.7034	10.3814
A_32_P93442	lnc-CDH16-2	7.20601	8.30545
A_23_P42695	GGCT	14.4198	13.4005
A_23_P115872	CEP55	12.1836	10.2867
A_24_P416346	ETV4	10.1663	8.69536
A_23_P171150	KLHL4	5.34141	6.55944
A_32_P413671	NA	2.52287	4.8676
A_23_P74068	MSH4	5.13619	3.48821
A_23_P89431	CCL2	5.15219	2.8434
A_23_P76071	B3GNT4	5.99399	4.95203
A_24_P513262	NA	7.0254	8.41209
A_32_P231547	LINC00623	5.06827	6.10508
A_24_P896765	NA	3.3492	5.77927
A_32_P228625	NA	5.14345	3.51797
A_24_P326660	MCAM	10.4935	8.93768
A_32_P56037	lnc-RGS5-1	7.88289	8.96325
A_24_P100830	AMN1	5.45773	7.02776
A_23_P92860	CCNO	10.1743	9.11627
A_24_P911648	NA	6.73974	8.1539
A_24_P730256	NA	11.2456	12.3225
A_32_P24372	TBC1D3C	3.70334	4.90367
A_23_P365086	ANKEF1	7.0597	6.00581
A_23_P68610	TPX2	13.135	11.9275
A_23_P408955	E2F2	12.0783	10.1141
A_32_P890614	LOC100268168	5.61985	4.03189
A_23_P431789	ARF4	14.7326	13.4068
A_32_P221966	SFTA1P	6.82317	5.43164
A_32_P188850	NA	5.79743	7.41432
A_32_P62508	NA	4.35264	5.481
A_32_P223441	ANKRD54	8.258	9.62408
A_32_P189385	NA	7.91414	6.70849
A_24_P248007	NA	7.07002	5.16724
A_23_P154037	AOX1	10.9545	12.4672
A_24_P366546	NA	13.542	14.7414
A_23_P15394	CD68	9.66733	10.7121
A_23_P205808	BLOC1S6	9.22071	10.2875
A_32_P183718	SP5	9.44147	7.29997
A_23_P369150	NA	6.956	8.05401
A_32_P99933	NA	5.18664	3.98347
A_24_P233256	ZNF649	6.01881	4.82017
A_24_P843309	NA	4.51768	6.19048
A_24_P363615	MTPN	14.0345	12.7352
A_24_P204374	NA	3.1031	4.68822
A_24_P800824	NA	4.83259	6.15764
A_23_P346093	TMC8	6.88289	5.74622
A_24_P378581	ABCA6	2.49546	5.54866
A_23_P102122	ARPC2	15.066	14.0556
A_32_P840235	NA	5.67048	3.62482
A_24_P931377	NA	5.85027	4.59306
A_23_P348253	CDHR3	5.07167	6.38085
A_23_P66881	RGS9	2.61522	6.27956
A_32_P119096	MBOAT2	10.9779	9.69257
A_24_P33982	MILR1	8.03326	9.50486
A_24_P59607	C17orf51	10.0838	8.99704
A_32_P188135	NIFK-AS1	4.53062	6.24286
A_23_P14957	CDR2	10.1675	11.3346
A_24_P50245	HLA-DMA	6.83153	8.0101
A_32_P77421	NA	5.41098	4.36017
A_24_P640341	NA	3.88754	5.01732
A_24_P14485	RBM38	7.91589	6.5345
A_23_P33326	ADRA1B	6.08241	7.09042
A_23_P118174	PLK1	10.1355	8.08766
A_24_P16610	ZNRF1	9.37846	10.7431
A_24_P281975	GNPTAB	11.139	9.74435
A_23_P202894	ACRV1	2.51725	4.68015
A_23_P29830	CBLB	5.353	6.96979
A_23_P30707	NA	5.53762	3.04574
A_32_P41744	NA	5.50446	8.80498
A_23_P50250	CKM	2.4332	5.12673
A_24_P565898	NA	6.99194	5.74432
A_24_P659393	LINC01431	5.15881	6.20537
A_24_P255543	NA	8.60458	9.7754
A_23_P119735	ZFP30	5.61398	4.27419
A_32_P133780	NA	5.41467	7.83133
A_32_P151747	SMIM2-AS1	6.56809	7.90513
A_23_P415411	HIST1H4E	13.4367	11.6191
A_32_P4495	NA	7.37023	6.27654
A_23_P34700	TNNT2	4.05521	5.12359
A_23_P111981	LYNX1	6.57627	7.70964
A_24_P4170	CPA6	3.00413	4.89843
A_23_P571	SLC2A1	12.2158	13.461
A_24_P500584	XIST	2.83796	5.59271
A_32_P129689	NA	5.55893	4.36414
A_23_P14255	GUCY1B2	7.22331	8.53542
A_32_P89730	LOH12CR2	5.9612	7.34873
A_23_P152666	COX11	13.3839	12.1915
A_32_P165297	MBNL3	6.97313	5.8961
A_24_P944541	PREPL	7.7038	6.56401
A_23_P64888	TAS2R10	5.58552	6.75
A_24_P925186	SOX5	3.67963	5.41976
A_23_P33583	DNAH7	8.46111	11.3997
A_23_P255038	IL1RAPL2	3.84856	5.34338
A_24_P110503	DBX2	6.02003	3.67781
A_24_P921986	NA	5.31026	2.43426
A_23_P339705	WDR62	8.96407	7.45548
A_24_P936419	NA	7.30732	5.33472
A_23_P161686	ARHGAP32	8.48428	9.65686
A_32_P208350	TDRD9	5.15827	7.37023
A_23_P91900	SMC4	12.3894	11.2651
A_32_P235293	NA	10.6228	9.49109
A_24_P477353	NA	9.40365	11.1257
A_23_P81058	BMP3	3.52812	6.352
A_23_P49310	ERN2	6.47781	5.28936
A_24_P929166	NA	2.49506	5.21766
A_23_P138099	ABL2	8.24939	9.27183
A_23_P353717	RMI2	12.4671	10.0396
A_23_P412427	LOC171391	5.41295	3.89574
A_32_P69465	MORN2	11.5828	10.0354
A_23_P127608	TMPRSS4	3.46243	4.78026
A_24_P478745	LINC01506	4.53321	6.46005
A_23_P160689	LRIF1	8.23321	9.35547
A_32_P135972	NA	2.41847	4.63375
A_23_P81327	LOC57399	5.84446	4.07475
A_24_P174924	HIST1H3B	14.2005	13.0246
A_32_P82475	SNHG10	6.92553	9.04974
A_32_P11947	NA	5.47592	3.82931
A_23_P135634	MAGED1	15.0915	16.096
A_23_P44724	CSRP2	14.1446	12.4368
A_23_P316472	DNHD1	6.57201	7.74508
A_24_P245379	SERPINB2	4.99616	6.00965
A_24_P192627	MLLT3	5.92518	6.95744
A_24_P260440	TNPO1	10.3999	9.29595
A_24_P924571	NA	5.44706	3.73763
A_24_P228026	CYB5D2	8.60742	9.66023
A_23_P501933	CACNG6	8.02906	6.83397
A_23_P19389	HMGN4	12.8935	11.0022
A_23_P23669	PALMD	7.33514	9.24643
A_32_P201603	NA	4.96634	3.62331
A_24_P56484	BRMS1L	9.54002	7.91898
A_23_P102517	PDE6D	10.9815	9.81848
A_24_P918907	LOC154761	4.4214	6.9409
A_23_P42032	IMPG1	3.34945	5.25884
A_24_P868987	NA	5.44169	4.29603
A_23_P255952	MYO6	10.4344	9.07258
A_32_P14187	TFAP2A	7.97529	9.44795
A_23_P334447	FHAD1	3.63394	5.36878
A_32_P165330	TTC3	9.13588	11.1958
A_24_P555170	UBE2Q2L	5.93853	6.9572
A_24_P175176	PHTF2	10.8123	9.68201
A_32_P100439	MTURN	9.94591	11.8713
A_32_P162183	C2	7.29868	9.12147
A_23_P24311	ALDH3B2	6.46461	5.19658
A_32_P167239	AFAP1L1	10.7092	9.54002
A_23_P149153	PDE4DIP	5.44471	7.07671
A_23_P142310	MKNK2	13.718	15.0714
A_24_P144936	KIAA0319L	9.76781	10.7929
A_23_P71368	RP1	4.37845	5.54049
A_23_P133123	MND1	10.6662	9.16389
A_32_P204169	TTLL7	7.29457	6.08552
A_32_P108396	NA	5.37487	3.51388
A_24_P246148	LOC101929155	2.9494	5.55523
A_24_P30389	MS4A15	5.39203	3.61879
A_23_P97402	CAMK1G	5.72187	6.7535
A_32_P57775	NA	9.37401	10.9779
A_24_P416489	MAP2K6	8.46522	6.32451
A_24_P650589	NA	5.08076	4.0584
A_32_P145856	NA	8.24674	9.6244
A_23_P327643	SMC4	7.87104	6.82008
A_24_P696761	LEMD1	3.89228	6.89032
A_24_P916494	PPA2	6.54794	8.27135
A_24_P314571	SPC24	10.8809	9.19319
A_24_P205213	ARSB	7.13827	6.10745
A_23_P88559	LIPC	5.5861	4.47492
A_23_P47924	PTPRR	6.85185	9.32855
A_23_P347100	NA	11.8515	13.016
A_32_P153361	NA	8.04346	6.15591
A_23_P103256	CFHR3	4.33048	6.24709
A_23_P116829	UBE2N	10.2676	8.92592
A_23_P59582	SEMA3E	3.40942	5.60038
A_32_P95541	NA	11.8662	12.9544
A_32_P98423	NREP	5.66517	7.26808
A_32_P120791	lnc-EYS-2	3.94351	5.3952
A_32_P73304	NA	7.14022	8.14976
A_24_P23411	ARMCX3	8.20103	9.39848
A_23_P69068	PLXNA1	6.67256	8.03857
A_23_P376239	PAPOLA	10.7682	9.66527
A_24_P259970	NA	5.07444	3.92118
A_24_P272310	MUSTN1	7.03713	8.5144
A_24_P159635	LIMD2	6.92181	5.69981
A_23_P7582	TCF7	8.5427	9.65178
A_23_P210285	NA	14.8952	16.1285
A_23_P50331	FAM32A	11.2737	12.4328
A_24_P100535	SYT15	8.11955	9.81926
A_32_P164061	NA	7.41882	6.30875
A_24_P136011	NA	13.3316	14.4222
A_24_P477048	NA	6.55872	7.84032
A_23_P5626	NA	3.12618	4.80371
A_24_P490704	NA	4.79899	5.98513
A_23_P143309	SLC4A11	6.91103	5.66806
A_23_P44857	NA	5.30731	3.94286
A_23_P210811	CD93	5.1633	3.6754
A_23_P500400	ABCA6	4.48376	5.76333
A_23_P14673	IGDCC4	5.71693	6.97813
A_24_P286845	REEP3	8.70209	7.46627
A_23_P331379	NEDD4	8.49201	7.38638
A_23_P135271	B4GALT1	6.73395	7.79091
A_23_P54297	EIF3J	13.9236	12.3092
A_24_P264772	PPIAL4G	11.6373	12.6512
A_23_P200310	DEPDC1	12.0588	10.0117
A_32_P55344	NA	8.29343	9.69542
A_24_P144601	POU5F1	4.06073	5.22368
A_24_P693461	SFTA3	6.21258	2.37163
A_23_P20311	DPYS	2.40098	4.61854
A_32_P47157	LINC00950	5.21464	7.13403
A_24_P911644	NA	2.40159	4.9147
A_24_P252130	PPARD	12.6789	13.9089
A_24_P479141	NA	2.42925	5.0325
A_24_P212409	NA	3.32782	5.05243
A_24_P359267	AKT2	14.3854	12.9486
A_23_P8142	CLPS	7.36537	6.00078
A_24_P307384	NA	3.54429	5.15142
A_24_P79808	PBXIP1	7.97771	9.31801
A_24_P419276	ZNF248	8.96687	10.1797
A_23_P255601	TMEM185A	9.36997	8.18783
A_24_P391991	FAM183B	5.41082	7.64947
A_32_P498899	KIAA1244	2.47239	4.78197
A_24_P108863	SCML1	9.43566	8.15476
A_23_P133338	CDHR2	6.17597	4.50028
A_23_P110288	GSTCD	7.34488	6.25323
A_24_P134392	HSPA13	11.4232	10.1667
A_32_P62106	SNX29P2	6.59607	7.84683
A_24_P877785	FAM53B-AS1	2.39106	4.79076
A_23_P374844	GAL	8.85867	7.7577
A_23_P123336	PDP1	11.7279	12.9462
A_23_P413923	DMRTA1	7.99444	9.54295
A_24_P246173	MYO9B	11.0754	12.1372
A_23_P150974	HOXC4	2.42416	5.48257
A_24_P323598	ESCO2	9.31971	7.98574
A_23_P427114	GORASP1	7.69857	6.60056
A_24_P934861	NA	3.55585	4.66509
A_32_P75902	MEIOB	2.38792	5.46092
A_32_P96036	MEX3A	10.5029	12.0811
A_23_P119202	CD70	9.30553	7.62198
A_23_P93169	LGSN	2.40518	5.45492
A_23_P85534	GPR52	5.00293	3.24952
A_23_P385826	ZBTB44	2.44238	4.7231
A_23_P10518	TFDP3	2.46454	4.67174
A_23_P301414	ERG	5.7195	2.43111
A_24_P923113	TMOD3	8.89447	6.99661
A_23_P100127	CASC5	11.6482	9.80541
A_24_P937691	EXPH5	8.43759	9.51608
A_24_P115511	RAB14	6.88618	5.85528
A_23_P21436	PHF19	10.1741	8.36494
A_32_P163996	NA	5.35949	6.38856
A_24_P940275	FRMPD4	2.38164	5.05355
A_23_P318464	EPHA8	2.72672	6.25953
A_32_P53884	KIF1C	8.84633	10.0558
A_24_P401090	NA	5.0091	6.30279
A_24_P539039	OR7E47P	2.41772	4.75785
A_23_P135015	RGP1	3.72993	5.79567
A_32_P84714	NA	4.33798	5.50537
A_23_P138885	FIBIN	6.32128	4.76902
A_24_P57898	BHLHE23	13.8426	12.2756
A_23_P83234	ZBTB6	5.90083	4.88215
A_24_P356015	EIF2S1	11.3456	9.90177
A_32_P50815	TBPL1	6.53825	5.37465
A_24_P64442	EHF	8.47388	9.51634
A_24_P148094	LEPROT	10.3126	9.30579
A_23_P148990	HMCN1	6.30369	7.41171
A_32_P813412	LOC101928921	5.42164	2.38205
A_23_P108743	XIRP2	4.23776	6.45852
A_23_P122197	CCNB1	13.7445	12.3532
A_23_P36724	FBXL14	6.94976	8.10004
A_32_P70818	PAX9	8.62156	9.83693
A_24_P937231	NHSL1	3.92226	4.98779
A_24_P187056	ANKRD20A12P	3.71188	5.36749
A_24_P599340	OSBPL3	4.89707	5.90967
A_23_P2645	SDS	3.77068	4.89498
A_24_P878376	NA	3.5211	4.96933
A_24_P89080	DCK	8.69121	7.55452
A_32_P154872	NA	4.95833	6.81849
A_23_P13150	C11orf71	7.49271	9.44865
A_23_P17855	TRIOBP	9.18517	10.5348
A_24_P941359	FAM65B	4.62312	7.44338
A_23_P208567	PODNL1	5.04424	6.50689
A_24_P98948	GPRC5A	11.432	12.6301
A_24_P642306	NA	2.37441	4.83386
A_24_P302249	APOA2	3.6479	5.08839
A_32_P200934	NA	8.38282	6.7828
A_23_P19712	GMNN	12.9967	11.8168
A_24_P872971	NA	6.15349	4.75005
A_23_P407497	NRG1	5.10504	2.39794
A_24_P115621	EIF4EBP2	12.0372	10.8416
A_32_P219135	LOC401317	2.39128	4.8751
A_23_P99693	ZBTB1	10.2664	11.5296
A_23_P46606	LPGAT1	11.4848	10.3797
A_24_P196827	HLA-DQA1	3.02025	4.62016
A_32_P9337	NA	5.04088	3.14915
A_23_P39682	ZAP70	2.71966	4.98394
A_23_P410017	TBCEL	9.05911	7.07123
A_24_P111242	SVIP	7.5279	11.932
A_32_P233581	NA	2.39281	4.80964
A_24_P330668	UBFD1	11.1695	9.90831
A_32_P190682	NA	8.58261	9.94861
A_32_P125338	FAM43B	5.34695	7.10668
A_23_P107421	TK1	17.3069	16.2269
A_32_P421527	LOC644135	3.28287	5.34298
A_32_P334340	MLLT4-AS1	6.36014	3.90875
A_24_P248606	ACSL3	10.8317	9.5951
A_23_P76078	IL23A	12.7938	10.5156
A_32_P140132	LOC101928403	3.67781	5.7889
A_24_P332718	OR7E91P	3.0832	4.81464
A_23_P139434	PRB2	4.44076	7.66035
A_23_P159325	ANGPTL4	8.99769	11.2493
A_32_P226356	NA	6.71292	7.96216
A_23_P25698	SLC10A1	3.74186	5.02242
A_23_P161940	SCGB2A2	6.1404	3.96408
A_23_P343330	FLJ31715	4.8711	6.8815
A_24_P187094	NA	4.98223	6.27503
A_23_P62787	PRO2012	4.22651	5.27253
A_32_P129010	LURAP1	4.32135	6.76703
A_24_P923594	ZNF605	6.49528	5.30023
A_23_P168771	CCDC146	7.8919	9.57023
A_23_P88106	MCF2L	2.36312	4.57711
A_23_P207850	TNS4	10.7537	9.52552
A_23_P251268	LINC00852	5.44872	6.50154
A_24_P734953	TRNP1	12.196	10.7906
A_32_P20997	CSE1L-AS1	5.55549	4.15258
A_32_P518489	ZBTB46	2.643	4.77829
A_23_P305335	RBM8A	4.96967	6.88407
A_32_P200586	NA	6.48514	5.33283
A_23_P212968	UGT2B11	5.63909	3.60488
A_24_P497524	LINC01206	2.87967	6.1397
A_24_P733345	NA	4.45832	5.73623
A_23_P6293	UBASH3A	3.73748	5.45239
A_24_P649874	NA	2.86814	4.74364
A_23_P10640	ENPP7	6.0646	4.35963
A_32_P153423	DDX52	10.2149	9.14124
A_32_P104432	LINC00087	7.97038	9.796
A_32_P125525	NA	8.98703	10.1317
A_32_P5542	NA	4.87059	5.95636
A_23_P364236	MGA	4.7196	6.02488
A_24_P579107	NA	4.09238	5.24679
A_32_P161327	NA	8.51904	7.08219
A_24_P20795	IRX4	8.97149	7.60031
A_24_P928658	SFTPA1	6.38957	4.30353
A_23_P96209	REEP4	11.0604	9.83385
A_23_P300100	PLA2G2D	2.39536	4.82043
A_23_P51787	AMPD1	2.38932	6.51703
A_23_P167553	DHFR	7.89911	6.61411
A_24_P576506	SPRN	3.79006	5.2736
A_23_P144622	GNPDA1	8.96956	10.2481
A_23_P24332	MUC15	2.36217	5.68377
A_23_P57379	CDC45	12.943	11.4096
A_24_P133162	STPG1	9.00654	10.0223
A_32_P170814	NA	8.80412	6.89092
A_32_P167176	NA	10.6466	11.763
A_32_P147622	MCF2L-AS1	7.54716	6.45374
A_24_P123347	PPAT	11.8762	10.5309
A_24_P218056	NUDCD3	6.37151	7.60693
A_32_P100947	NA	5.88074	7.15902
A_23_P321501	DHRS2	10.2731	9.04553
A_23_P318296	PLEKHA8	5.524	6.76901
A_23_P92334	TMEM156	8.44437	9.83112
A_24_P289043	NA	2.4565	4.6758
A_23_P100959	ZFP3	5.34805	4.34285
A_24_P330518	CA12	8.58747	9.83724
A_23_P50517	ZNF541	2.56399	5.63747
A_24_P310864	CCDC24	11.6075	10.4252
A_23_P85209	IL13RA2	7.86833	9.39213
A_32_P6172	LINC01003	8.75637	9.82639
A_23_P25587	LECT1	3.31264	4.55981
A_24_P418517	NA	7.44004	8.55894
A_23_P60079	ANGPT2	2.56267	4.59795
A_32_P165363	LOC101930240	3.33683	4.91527
A_24_P942528	NA	4.18459	5.53035
A_32_P62248	LOC100507616	3.57975	4.84141
A_24_P114459	RYBP	9.69854	11.0802
A_23_P214444	TAP2	7.05953	5.62915
A_24_P303594	ACTR3B	8.13775	9.17488
A_24_P561377	NA	5.8833	3.67662
A_23_P4190	ACSF2	10.3503	11.4788
A_32_P13392	NA	7.67137	8.86279
A_23_P90453	KRTDAP	3.59298	5.353
A_23_P128728	ARG2	6.86893	9.08863
A_23_P213415	SEMA5A	4.6032	5.8418
A_32_P194974	NA	2.34601	4.75978
A_24_P16273	NA	6.51498	4.20657
A_23_P371276	RNF165	7.34873	8.47706
A_23_P150935	TROAP	13.4154	11.4573
A_24_P84719	NA	7.87895	8.93495
A_32_P212712	NA	6.14458	7.36261
A_24_P512775	NA	2.38874	4.95523
A_23_P126727	NOL9	11.5879	10.4766
A_23_P120354	SOWAHC	11.0427	9.94288
A_32_P11276	NA	3.41502	5.02351
A_24_P98109	SNX10	9.84065	8.65451
A_23_P141505	CLEC10A	5.1082	2.91862
A_23_P214681	PPARD	7.62198	8.74793
A_23_P41664	LRRC70	7.19992	5.98552
A_32_P224522	SLC25A23	12.106	11.0491
A_32_P211414	LOC101927824	3.728	6.40776
A_23_P19030	ARSI	6.58531	5.19333
A_32_P42946	C1orf210	2.5645	5.10504
A_24_P341292	ZNF665	5.24972	7.14173
A_32_P192881	lnc-TP53INP1-1	3.4563	4.57752
A_23_P136671	UGT2B7	2.34217	5.03212
A_24_P570583	ZNF542P	2.89718	4.65038
A_23_P368205	PIP5K1A	11.6042	10.416
A_32_P178099	OTUD7B	10.264	11.8029
A_24_P585770	GNAQ	3.62482	5.57695
A_23_P216693	MLLT3	6.93686	8.03664
A_24_P109703	NA	3.19102	4.9371
A_23_P69617	UNC5C	3.63403	4.68668
A_23_P40295	LAMP5	6.57556	8.66425
A_24_P367900	ANGPT2	2.35528	5.24939
A_23_P433132	KRTCAP3	3.878	5.28983
A_32_P194915	TRAPPC5	8.09911	10.3514
A_23_P60120	GSDMC	6.22528	4.68538
A_32_P129894	MEGF9	8.45644	9.64856
A_32_P199263	NA	7.99708	6.95537
A_23_P88630	BLM	10.7051	9.21437
A_32_P89997	LOC101929178	7.44812	8.6904
A_23_P502957	CDH26	2.48187	5.06157
A_23_P159775	GABRE	3.27867	5.45546
A_32_P75264	TMEM26	2.53676	4.9329
A_23_P69699	NPY1R	8.833	9.94493
A_24_P760368	CCDC144NL-AS1	2.35616	4.57737
A_23_P215406	RAC1	12.6962	13.7616
A_24_P623814	NA	6.42113	8.38027
A_23_P22744	PAGE5	4.87259	6.20147
A_32_P132748	NA	8.29243	9.70116
A_23_P320190	CCDC150	7.34564	6.21861
A_32_P115258	NA	9.32347	7.35301
A_32_P80776	lnc-NKIRAS1-3	3.75895	5.27418
A_23_P52323	COL17A1	3.5581	4.64538
A_24_P65292	SOX8	11.3892	9.56583
A_23_P213171	MTTP	2.3304	4.99646
A_23_P421493	HPR	2.33649	5.83402
A_23_P429491	DDIAS	12.0011	10.4389
A_23_P58266	S100P	11.3961	13.3677
A_32_P23512	NA	6.12079	4.456
A_23_P4808	PTGER1	8.43951	7.37204
A_23_P41314	F11	3.02488	4.71597
A_23_P317056	ND6	8.61449	6.95684
A_24_P75917	CCDC144A	3.92646	5.14615
A_24_P48248	C17orf53	7.50636	6.35644
A_23_P501713	IL1F10	4.29944	5.62882
A_24_P910338	DOC2A	6.19583	4.38869
A_23_P135857	EIF2AK3	7.83004	9.15634
A_24_P796652	NA	9.63468	10.6516
A_24_P921186	ARL17A	3.20098	4.64512
A_23_P310931	CNR2	2.90675	4.93909
A_32_P232883	LOC100507165	2.57161	4.95352
A_24_P254285	MGME1	10.9035	9.85711
A_24_P942890	NA	2.36475	5.47198
A_23_P339773	TPRG1L	11.0863	9.61672
A_23_P91859	TRANK1	3.40471	4.97224
A_24_P153643	DOCK3	4.94097	6.23336
A_23_P340909	SKA3	12.4684	10.7422
A_23_P69537	NMU	12.644	11.4139
A_23_P340312	TAS2R19	2.37484	5.66686
A_23_P62173	TEX13A	2.37131	5.52363
A_24_P383130	NA	11.1747	13.5081
A_23_P258978	GOLGA1	8.07054	9.23359
A_24_P273423	NA	7.97078	9.55398
A_23_P358394	FAM65B	4.24486	6.03096
A_24_P212024	NA	6.03851	8.16838
A_32_P222695	ARHGEF37	9.48206	10.5908
A_23_P416034	HAUS7	7.55038	6.34905
A_23_P325924	GAREML	6.75306	4.69654
A_24_P240065	CHMP3	10.4283	11.6941
A_23_P32143	ALDOB	3.29219	5.78949
A_24_P33156	AFMID	8.71003	7.53627
A_23_P209215	STAM2	9.60713	8.31402
A_23_P206359	CDH1	9.92354	11.0783
A_32_P228183	NA	3.89391	5.5064
A_23_P21230	TRIM37	11.6224	10.5206
A_23_P360291	TAPBP	6.18373	4.27151
A_24_P930635	NA	7.07693	5.68838
A_23_P327022	MDFIC	9.05313	7.58731
A_23_P128254	SLCO1B1	6.62889	4.89374
A_24_P73408	NA	8.46791	9.47487
A_24_P217758	MFAP3	8.70319	7.20276
A_23_P301372	TAPT1	9.09149	7.85358
A_23_P88484	DUT	15.2267	14.1396
A_23_P123308	TEX15	2.62249	5.80756
A_23_P128384	VPS29	10.3473	11.5157
A_23_P114349	XAGE3	3.01994	4.9256
A_24_P833067	NA	2.33318	4.70899
A_23_P80839	MAP6D1	12.9147	11.6441
A_24_P339436	GNAL	3.27914	4.64161
A_23_P324754	CEMIP	6.13447	7.70398
A_24_P220947	AKR1C1	7.82613	9.54932
A_24_P670942	NA	5.58404	6.66245
A_23_P378458	FAM71E2	5.88649	2.59086
A_23_P117380	FAM181A	7.64437	6.62204
A_23_P357270	SLC17A4	5.72701	4.45
A_23_P160226	MROH7	8.78441	7.02829
A_23_P22129	HAP1	5.33361	6.37893
A_23_P153480	KLK5	4.52966	5.58812
A_32_P170879	NA	3.16057	4.74674
A_24_P921390	NA	2.33851	5.749
A_23_P117782	LARP6	12.6535	14.2292
A_24_P413941	C2orf69	11.2705	10.2521
A_32_P21993	TPM4	10.4939	12.0546
A_23_P204375	LPAR5	5.45925	4.38232
A_24_P64241	ANKRD20A2	6.12866	7.35327
A_24_P659099	ATP5F1	5.74171	6.83117
A_24_P833211	NA	6.98243	4.41819
A_32_P207147	LOC102724124	5.72434	4.47399
A_24_P926285	CAMKMT	6.54923	5.03183
A_24_P128001	ZNF395	13.004	14.0974
A_24_P935986	BCAT1	3.09339	6.36035
A_32_P13533	LOC101930035	3.36576	4.70162
A_23_P258972	GOLGA1	10.2487	11.2823
A_32_P130290	NA	8.4894	10.7544
A_24_P260639	HIST1H1D	13.4721	11.4375
A_32_P204239	CDHR3	2.46332	6.85745
A_23_P301247	HIST2H2AC	13.8041	11.9035
A_24_P936736	NA	2.32719	6.29625
A_23_P211417	RFPL1	3.92829	5.17938
A_23_P355525	HECTD2	8.46938	6.93354
A_24_P323635	NA	9.9954	11.0267
A_24_P919249	ADCY5	5.01938	3.7233
A_32_P437227	FAM84B	3.72478	5.90448
A_23_P133536	CAPSL	6.14262	7.15843
A_23_P431179	HIST1H4A	7.9372	6.57015
A_32_P224638	NA	4.74894	5.88689
A_23_P412577	ANKRD29	10.4862	11.7228
A_24_P406245	NA	8.7997	7.64637
A_24_P646279	NA	4.55273	5.57234
A_24_P453497	RBM20	3.94372	5.50232
A_23_P88435	FOXN3	8.32379	9.53979
A_24_P929202	NA	2.32614	6.30153
A_23_P23341	CNKSR1	6.00718	4.18218
A_23_P502797	WDFY1	10.7544	9.62765
A_32_P48466	LCA5L	5.51636	7.15642
A_32_P92163	EXTL3	5.23504	6.75132
A_24_P243881	TCEB1	11.5525	10.3804
A_23_P409648	SP140L	4.27899	5.89771
A_24_P260325	LRAT	2.38467	6.1404
A_23_P410224	C6orf52	6.94968	8.33626
A_23_P23980	PLEKHS1	5.76309	3.39891
A_32_P169831	NA	5.23447	6.45159
A_32_P148058	RUNX2	2.30758	5.65414
A_23_P50008	TTC19	12.1754	10.8257
A_24_P359491	NA	5.6281	2.36076
A_24_P378331	CASC5	6.40405	5.19146
A_32_P63324	LOC102724782	9.50645	10.5454
A_23_P44684	ECT2	11.3147	10.153
A_24_P312671	MRE11A	6.97951	5.09932
A_32_P135391	NA	2.36464	5.1098
A_23_P39525	FAM124B	2.36419	5.46515
A_32_P90709	CEP85L	8.36284	9.80948
A_23_P377909	NA	3.3121	4.64339
A_24_P686243	NA	3.18608	4.57175
A_24_P247849	PBX1	2.32653	4.74752
A_23_P217341	MAGEB1	2.31128	4.89109
A_32_P117186	NA	8.19975	9.25824
A_24_P24387	NA	5.35074	6.45621
A_23_P26522	AQP8	2.82287	5.16415
A_23_P93727	SDK1	2.3323	4.62372
A_32_P40304	NA	5.36811	4.12225
A_23_P97562	CYP4A11	5.29321	4.21699
A_23_P33433	MAZ	8.22664	6.98969
A_23_P200325	RABGAP1L	9.12227	7.44297
A_32_P78295	ATOH7	4.61161	5.86133
A_23_P148088	FGG	2.30358	5.354
A_23_P39067	SPIB	5.05137	2.89561
A_32_P233799	NA	2.92083	5.17005
A_23_P38876	LIPE	8.59607	7.4406
A_23_P36448	TMED2	11.1685	10.11
A_32_P24376	KRTAP2-3	10.1975	8.92822
A_23_P203601	UCP3	7.87755	9.58609
A_23_P35092	IL19	2.3611	4.80226
A_23_P148345	RNF128	4.76291	6.05632
A_32_P188825	TDRD12	2.87012	4.57631
A_23_P203439	KCNC1	2.35411	4.56056
A_32_P205624	SHC2	7.5674	6.45209
A_24_P127192	NA	2.35945	4.90012
A_24_P183963	OSTF1	5.03183	3.88378
A_23_P116430	USH1C	2.96676	4.93671
A_23_P46499	NA	5.60203	6.70994
A_32_P201292	NA	2.29889	4.85267
A_32_P146826	NA	6.1114	7.99867
A_24_P927972	NA	2.3408	5.08409
A_24_P19410	CBX7	9.59335	10.7139
A_24_P408981	NA	9.50601	11.5203
A_23_P418485	C11orf65	6.1654	7.68341
A_32_P44453	INPP1	8.86065	7.60314
A_23_P206059	PRC1	13.4657	11.9381
A_23_P52761	MMP7	3.98229	5.27889
A_23_P395033	DTX2	6.32553	5.1398
A_24_P418908	NA	6.57775	7.82468
A_23_P158231	APBA2	8.68107	9.77443
A_32_P218493	NA	11.1639	10.1638
A_32_P43409	SRP14-AS1	6.8893	8.62497
A_24_P152968	AKR1C1	6.88856	7.89733
A_24_P668351	NA	6.08705	7.35695
A_23_P111260	NT5E	9.56353	7.6048
A_23_P392994	RABL6	4.04869	5.27384
A_23_P200138	SLAMF8	5.26954	2.35196
A_24_P204238	NA	4.36325	6.43708
A_23_P93780	HGF	5.94809	7.32515
A_24_P920139	NA	3.41053	5.5564
A_23_P408094	MXD1	6.68858	7.70335
A_32_P216122	NA	6.04634	7.63059
A_23_P80867	VWA5B2	6.42604	5.05528
A_23_P69329	HYAL1	2.47953	5.46864
A_23_P214944	ALDH8A1	2.35557	4.79013
A_24_P24848	PSORS1C1	6.21168	8.34658
A_24_P647021	LOC100996263	3.47543	4.59195
A_23_P8055	NRM	10.2581	8.90534
A_24_P307808	KCTD16	2.2961	5.64173
A_24_P934546	SFRP2	3.80628	4.89583
A_24_P119259	BLZF1	4.89356	6.57157
A_23_P305273	EPG5	4.86437	6.60858
A_24_P218074	ZNF467	15.0845	13.8437
A_23_P65910	LRRC57	8.41568	6.87497
A_23_P160025	IFI16	7.84243	9.3119
A_24_P325025	lnc-C16orf61-2	3.15056	4.82992
A_23_P309396	RP1L1	3.82009	5.04157
A_24_P333525	RABGAP1L	10.139	8.32584
A_32_P56952	NA	4.63462	5.90988
A_24_P393014	NA	3.75632	4.90758
A_23_P204333	ALG10	9.21704	8.14515
A_23_P110108	SLC12A8	3.29486	6.26933
A_23_P35871	E2F8	9.00779	7.55136
A_23_P205370	ASB2	7.02723	5.84887
A_32_P175957	lnc-STYX-1	9.24959	8.0885
A_24_P32151	FAM101B	5.54984	4.34377
A_23_P52597	C1QTNF4	5.98208	4.86615
A_24_P918106	NA	2.47966	4.84261
A_24_P219418	LOC162137	9.82622	5.91602
A_23_P393144	GJD4	2.47617	6.12708
A_23_P46894	CHAT	5.78335	7.53591
A_24_P914759	PLEC	2.35297	5.34723
A_23_P386310	HRH4	3.62566	4.80168
A_23_P73870	CSPG4P1Y	2.299	4.61161
A_23_P162171	MCAM	12.504	10.9551
A_23_P94319	KBTBD11	10.7363	9.5945
A_24_P247596	NA	11.3049	10.2656
A_24_P118382	NA	8.24829	9.68436
A_24_P171549	CDCA7	8.34964	6.95245
A_23_P74290	GBP5	6.08214	4.229
A_23_P211997	SEC22C	9.46442	8.42163
A_32_P232214	TRABD2B	8.82431	7.26342
A_24_P95822	NPTN	10.2107	9.18137
A_23_P104282	FAM178A	7.78899	6.74253
A_23_P110896	SLC17A5	8.71844	9.8948
A_32_P13081	NA	6.66955	8.04747
A_23_P500998	HOXA9	12.923	14.092
A_32_P198523	FSIP2	4.23725	6.05431
A_23_P216517	ARHGEF39	7.01029	5.80225
A_32_P209669	NA	7.42652	5.87498
A_24_P917280	ALDH1A3	6.93406	8.54097
A_24_P319369	F11R	6.82901	8.58849
A_32_P128661	TMED5	7.1544	5.50802
A_23_P103601	MAN1C1	8.23546	9.28845
A_24_P337419	TIGD6	6.90319	8.06972
A_23_P142872	TCF7L1	8.49939	9.68629
A_24_P357726	PSG8	2.54748	5.14731
A_24_P81695	SNX19	7.80686	8.83802
A_32_P196287	NA	4.68822	6.25139
A_23_P15055	HBM	6.18613	4.86797
A_23_P375	CDCA8	14.0283	12.0481
A_24_P323421	MIA3	7.88865	9.2301
A_23_P3274	IGDCC3	4.5174	5.55893
A_32_P201979	HECTD2	7.60693	6.55241
A_23_P319557	NA	4.35238	5.6463
A_23_P24835	PTH	6.39764	4.94229
A_24_P307306	NA	6.50708	7.71877
A_23_P385126	DEPDC7	3.49049	4.87059
A_32_P221	C16orf78	3.7968	4.80199
A_24_P659113	CCNYL1	9.34662	7.87068
A_24_P307498	ANKRD45	4.54803	5.71464
A_32_P207096	lnc-C6orf94-1	3.17686	6.25269
A_32_P39944	NA	12.979	14.0476
A_32_P179572	NA	5.62727	4.37079
A_23_P218434	ZNF226	10.9548	12.456
A_23_P166376	GGT5	6.3426	2.54738
A_23_P132889	CRMP1	4.41142	6.84094
A_23_P45248	SH2D1A	4.16118	5.9025
A_24_P911676	SOX4	9.55398	10.7218
A_23_P211252	LSS	6.28132	8.52829
A_32_P122285	XLOC_l2_015762	9.54295	12.0423
A_23_P34366	HTR1D	3.44123	5.94851
A_23_P109974	RAB6B	4.64751	6.03039
A_23_P323749	PIF1	6.13494	5.05076
A_23_P217866	IFI16	9.44108	10.6971
A_23_P78108	ALDOC	9.19829	10.3745
A_24_P36097	RPAIN	10.2941	11.3219
A_24_P106297	AMACR	8.64206	9.66873
A_32_P217853	NA	6.31199	4.28263
A_32_P123652	TSPAN33	6.12259	4.83776
A_24_P941773	METTL7A	2.39075	6.5606
A_24_P337062	TSC22D2	5.64473	7.06527
A_32_P110655	LINC00633	4.07277	6.10889
A_32_P10623	NA	9.46373	7.85938
A_24_P152753	NA	12.8169	14.1595
A_23_P104438	MYPN	5.77863	8.39862
A_23_P14157	DZIP1	6.28314	4.87259
A_32_P40145	NA	4.44211	5.91686
A_24_P33429	NA	6.44328	7.69636
A_24_P162454	PABPC1L2B	6.52542	4.84182
A_32_P92445	LSAMP	3.99251	5.46138
A_23_P131060	CYP4F8	8.05496	5.94014
A_24_P516704	LOC100507140	5.99939	4.2992
A_24_P220548	ACSM2A	6.21985	5.06133
A_24_P129341	AKR1B10	8.87997	10.4872
A_24_P923190	NA	5.03012	7.0344
A_24_P853366	NA	5.62308	6.8835
A_24_P270279	LUM	6.10981	2.33537
A_24_P237624	BRICD5	7.4772	6.1978
A_32_P30966	NA	6.13959	7.93972
A_23_P109988	CD86	2.32312	5.7374
A_23_P218190	CAPN3	3.16892	6.11219
A_24_P296568	CBX1	14.0907	12.1696
A_24_P247324	NA	5.05062	3.16691
A_24_P358205	NA	9.93816	10.9842
A_24_P861685	NA	5.7196	4.32869
A_24_P410378	CMTR2	5.75781	6.96452
A_24_P282261	ZNF493	4.57095	5.87695
A_24_P618077	NA	3.55088	6.27211
A_24_P105102	PKMYT1	13.1781	11.6253
A_23_P137935	MNDA	2.31852	4.53235
A_24_P365679	RRP7B	3.43697	4.93133
A_32_P231179	TEKT4	5.84639	7.36018
A_24_P501285	NA	3.79897	4.84301
A_23_P58251	CPZ	8.54786	9.63272
A_24_P923591	PPIL2	5.70463	7.88248
A_24_P170902	NA	2.31399	5.51195
A_23_P10947	STAC3	3.12393	4.68734
A_24_P631848	NA	8.44745	9.50333
A_23_P211543	MCHR1	5.26414	3.36835
A_24_P248122	AFAP1L1	6.96577	4.80246
A_23_P216118	UNC5D	2.3372	5.51012
A_24_P17722	TBC1D9B	11.7746	12.902
A_24_P595223	MIAT	2.33353	4.65728
A_23_P113161	C1orf21	6.53982	8.26627
A_24_P721815	NA	4.00709	5.17267
A_32_P165753	NA	6.44006	7.57698
A_23_P377839	LINC00161	5.7274	8.40278
A_24_P356	AAK1	5.2308	6.33679
A_24_P350160	RSRC2	5.73377	8.40382
A_24_P941649	VPS37A	6.75084	5.52732
A_23_P132486	OXSM	11.3701	12.43
A_23_P39008	RLN3	2.81031	5.19407
A_32_P208321	NA	4.00188	5.31832
A_32_P203836	GEN1	6.19453	4.51135
A_23_P404785	OSTM1	7.72177	6.50859
A_32_P723414	LINC00317	2.31016	5.10691
A_23_P70998	UMAD1	10.5198	9.31426
A_24_P380196	CTNND2	4.05148	5.08818
A_23_P430201	CEP128	9.43834	8.35955
A_23_P33420	TLR10	2.27393	6.19813
A_24_P75456	NA	9.42668	11.0628
A_23_P326142	SND1-IT1	6.77238	8.04885
A_24_P7600	FBXL7	5.60118	4.51801
A_23_P21249	NA	2.30055	4.84089
A_23_P39171	GALP	2.31031	4.93871
A_32_P45615	NA	5.37632	7.03713
A_24_P280983	HOXA11-AS	12.4602	13.7507
A_23_P329727	MAPK8IP3	3.98532	5.29497
A_23_P9779	IRX5	3.09455	5.42106
A_23_P259438	DCK	10.5148	9.16909
A_24_P920355	CEP97	3.66847	4.82317
A_32_P116285	PENK	2.28001	5.19882
A_23_P96271	MYOM1	5.35321	6.55849
A_32_P7571	NA	2.395	5.79432
A_24_P383569	NA	6.8779	7.91547
A_32_P148118	NA	5.43467	8.02089
A_32_P179859	lnc-MTERFD3-1	7.31123	9.14256
A_23_P415611	SLC9B1	3.3136	4.83289
A_24_P882959	LOC284344	3.70364	5.58576
A_24_P13285	PPP1R1A	4.90062	3.58683
A_23_P116872	PRB4	7.26273	8.80781
A_23_P210726	CDC25B	12.4873	11.1573
A_23_P31161	CPA2	3.20501	5.34695
A_23_P253495	GSTA3	2.33372	5.17347
A_23_P400406	SOWAHA	4.17037	5.44354
A_32_P86763	TGM2	9.41472	8.29267
A_32_P29954	ADARB2-AS1	2.31238	4.6445
A_23_P206310	KIAA0513	10.5876	13.1647
A_24_P944054	CXCL12	3.53371	6.47898
A_23_P45133	CSF1	3.73282	5.79978
A_24_P227091	KIF11	11.9699	10.4649
A_23_P214408	UNC93A	3.22733	4.61882
A_24_P916522	PAX5	5.97209	7.00694
A_24_P901986	LOC102725300	3.82806	5.93325
A_24_P367645	MAP7D2	5.44112	7.10896
A_24_P401241	ZNF160	5.29747	6.70191
A_23_P101351	ZNF426	9.81476	11.0914
A_23_P145786	MLXIPL	5.74464	4.3555
A_32_P212343	NA	7.09879	6.00464
A_23_P207160	GH2	9.57793	7.44076
A_24_P247749	RAB21	8.91842	7.82287
A_23_P151405	CKAP2	11.4551	9.97098
A_24_P239330	NA	3.10247	4.65424
A_23_P429977	KCNQ1	5.14582	3.84819
A_24_P915256	CYP3A5	2.27298	6.06143
A_32_P84009	CMTM4	11.2523	10.0057
A_32_P172198	NA	5.64833	7.11134
A_32_P145477	NA	2.27406	6.48937
A_32_P108516	NA	9.52512	7.76733
A_24_P2361	CLCNKA	3.16941	5.64583
A_32_P101235	UHRF1	8.68077	7.55694
A_24_P58944	SDHAP1	9.84046	8.64088
A_24_P551067	NA	5.9633	7.19576
A_23_P52161	NUAK2	8.91066	7.7721
A_23_P59261	TPBG	11.7927	10.73
A_24_P910625	NA	2.31621	5.69635
A_32_P191441	C10orf90	5.32428	6.4137
A_23_P416212	HSPB9	4.63658	5.85462
A_32_P89441	NA	2.27242	6.21381
A_32_P61145	NA	9.60996	8.22364
A_24_P273303	NA	2.30729	6.38099
A_23_P47377	HSD17B12	13.0965	11.2264
A_23_P347194	LOC646903	4.85596	6.46337
A_24_P96403	RUNX1	11.98	13.4059
A_32_P19893	NA	5.12103	3.75848
A_23_P347131	TRAPPC12	8.25661	9.66851
A_23_P214360	IRF4	2.31647	4.54864
A_23_P142096	GPR32	3.75789	7.16869
A_24_P261417	DKK3	3.80218	6.17165
A_24_P525917	NFATC2	7.71172	8.81245
A_32_P141969	NTRK3	2.30275	5.97507
A_32_P58391	NA	4.11851	5.51889
A_24_P917686	NA	5.73657	4.53196
A_24_P941988	SPAST	10.0609	8.70951
A_24_P274072	INADL	5.27457	6.8656
A_24_P118196	GXYLT2	8.80054	10.3915
A_24_P626951	NA	5.1777	8.01573
A_23_P161698	MMP3	6.03554	7.46174
A_23_P120710	TTC3	12.3257	13.4154
A_24_P255914	NA	5.90129	7.24188
A_24_P320254	HNRNPH1	13.7351	12.5141
A_24_P607306	NA	2.27738	4.74143
A_24_P934740	NA	3.01874	5.58009
A_24_P281468	NA	2.30399	5.83966
A_23_P301328	PDXK	5.15758	6.30566
A_24_P914479	SNX5	10.0938	11.5923
A_23_P407551	BICD2	4.32188	5.38243
A_23_P5742	CCDC121	6.5345	7.92599
A_23_P109420	BMS1	11.6544	12.7623
A_24_P358146	NA	6.82072	5.28334
A_24_P82155	ANKDD1A	5.28273	6.59378
A_32_P213831	STRIP2	8.131	9.24071
A_24_P401124	NA	6.0765	7.34089
A_23_P162314	DHH	9.02084	8.01128
A_23_P139050	OR8D2	2.28738	5.31502
A_23_P339560	ZNF75D	6.14789	4.43392
A_32_P136204	NA	4.54337	6.37166
A_23_P17430	RBM38	8.82403	7.51878
A_23_P383435	ZNHIT3	13.7908	12.6804
A_32_P70724	KDM5B	10.431	11.4887
A_32_P171530	LIFR-AS1	6.26843	7.40498
A_23_P63789	ZWINT	14.8337	13.6293
A_32_P40128	NA	3.40594	6.32061
A_32_P222496	NA	4.34413	5.74203
A_23_P36611	APAF1	6.67769	5.63402
A_23_P42265	APOM	9.25824	10.4291
A_23_P206501	CLEC18B	4.97018	7.50428
A_24_P109487	PLEKHA7	3.79193	5.34883
A_24_P67784	RIMBP3	4.72176	7.32919
A_23_P157316	C7orf34	5.8851	4.24333
A_32_P114020	NA	7.61136	9.56926
A_24_P902509	FANCI	9.25555	7.91177
A_23_P302386	HLA-DOA	3.26406	6.41397
A_24_P307712	NA	6.85926	8.60853
A_24_P372189	WISP1	3.38019	4.86333
A_24_P501698	EIF3H	8.09411	7.04051
A_32_P148745	VWDE	8.54026	9.86036
A_23_P348911	LINC01126	8.25369	6.90278
A_23_P156928	GPLD1	4.63396	6.34849
A_24_P643028	FAM90A1	4.33814	6.28383
A_32_P166422	NA	8.92481	7.76889
A_23_P78092	EVI2A	3.7976	6.58446
A_23_P201940	LMOD1	5.94839	7.77468
A_23_P141606	BLMH	11.5978	10.4092
A_23_P65481	TEP1	10.49	11.6327
A_24_P201552	FEZ1	2.527	4.53717
A_24_P127954	NA	5.11284	3.351
A_32_P27795	SOGA3	5.32592	3.2993
A_24_P93309	CDNF	4.56379	6.18532
A_23_P87013	TAGLN	5.27677	6.32264
A_23_P257250	KIAA0922	4.83889	5.89648
A_24_P25040	NA	8.19349	6.91421
A_32_P202977	NA	7.49855	8.58534
A_23_P82169	SOX4	13.8739	15.0386
A_23_P133694	SLC29A1	11.9609	10.9446
A_23_P315273	MT3	2.34252	5.79288
A_23_P316612	GLIS1	10.7794	12.0568
A_23_P204541	CNTN1	5.57615	4.25209
A_24_P406301	NDUFB2	16.4237	14.8872
A_23_P152727	PLEKHM1	13.1421	14.6179
A_23_P160720	BATF3	7.66852	5.86148
A_24_P541831	LINC00264	5.70844	4.12346
A_24_P28562	FMO4	5.37895	6.53998
A_23_P363778	FRZB	6.24031	4.81596
A_24_P193295	RAB15	13.6495	12.3555
A_23_P122439	BTN2A2	8.70142	9.7261
A_24_P944627	NA	3.70155	6.80618
A_24_P244420	ACER3	12.6384	10.6975
A_23_P142031	SBK2	7.96087	6.58636
A_32_P212471	RIIAD1	7.24891	9.18986
A_24_P3704	GTF2H2B	8.52718	7.51228
A_24_P131589	CD86	4.3244	6.25408
A_24_P922948	FAM118A	5.49191	6.67539
A_24_P42389	OTUD6A	5.10719	6.21135
A_23_P108564	B3GALT1	6.28765	7.67422
A_23_P140725	IFT140	6.52913	7.6619
A_24_P41662	NA	5.81267	7.39048
A_23_P337422	SERBP1	10.5353	8.47626
A_32_P157208	PGM5P3-AS1	10.5058	13.516
A_23_P161197	SEC61A2	10.2734	8.64618
A_24_P160927	NA	3.61632	5.1856
A_32_P34920	FOXD1	10.8707	11.9445
A_24_P854492	MIAT	2.29399	4.83426
A_24_P118271	NA	7.86997	9.11974
A_32_P99638	THEG5	2.3131	4.80135
A_23_P13753	NFE2	6.61679	8.05179
A_23_P130677	C19orf80	2.26916	6.74795
A_24_P934289	NA	3.17566	6.98243
A_24_P410605	ROR1	7.48664	6.31388
A_23_P204380	GNPTAB	8.29046	6.75834
A_32_P232192	DIS3L2	5.48441	7.01796
A_32_P35847	NA	8.78274	7.62974
A_23_P42168	MDFI	7.3125	6.0212
A_23_P257803	DMGDH	2.79008	4.65632
A_24_P161809	NA	4.07768	5.36716
A_23_P372962	A2ML1	9.53016	10.7164
A_23_P207957	VAPA	11.7531	10.1165
A_23_P90888	CHRNA1	6.48122	5.2022
A_24_P23445	RNU12	6.11378	7.47786
A_23_P208915	DPP9	8.00801	6.93851
A_23_P6943	GPR15	4.36618	6.6658
A_24_P306896	NA	8.60653	7.44314
A_23_P24616	SIAE	8.92414	10.1973
A_32_P56154	NA	5.14793	4.10622
A_24_P940678	CASC5	7.51026	5.84375
A_23_P25503	FNDC3A	11.2052	9.9818
A_24_P582889	TPBG	5.07251	3.78938
A_24_P161173	NA	5.35254	6.36254
A_24_P294982	VTA1	9.84863	8.4178
A_32_P145447	ENO1-AS1	7.59977	9.04057
A_23_P39116	LIG1	11.306	9.963
A_23_P50108	NDC80	13.4307	12.0403
A_24_P250499	RPRD1B	11.9858	10.918
A_23_P132915	FAM114A1	8.13615	9.30072
A_24_P314962	FLJ44715	4.57247	5.91999
A_32_P70927	PAGE2	4.29603	6.09565
A_23_P151150	FOXM1	11.7237	10.2389
A_32_P55840	LINC01556	5.80468	7.28527
A_23_P321913	DEF6	9.16366	7.95041
A_32_P92751	LOC101929787	6.93881	8.88441
A_24_P274814	TBXAS1	9.24688	11.0217
A_24_P786388	CATSPER4	4.83386	2.39702
A_23_P164821	C19orf43	12.7269	11.6949
A_24_P413884	CENPA	10.3909	9.28523
A_23_P3921	FLJ11710	7.97672	9.36007
A_23_P303058	C5AR1	3.66162	6.22408
A_23_P105276	ZNF84	7.38782	8.59936
A_23_P126328	NA	3.29867	4.56532
A_24_P76821	LMOD3	2.3041	4.51595
A_24_P392030	LOC645752	5.39103	3.65507
A_23_P56146	RAX2	5.67624	4.41326
A_24_P349648	NA	7.11053	8.16155
A_24_P127042	NA	6.3192	7.3483
A_23_P150555	SCGB1D2	2.53438	4.67089
A_23_P301304	FGFR1	9.43148	10.6415
A_23_P308924	DUSP16	8.73563	9.83815
A_23_P160377	DNALI1	6.32973	5.20937
A_24_P330112	MAGOHB	6.18562	4.77688
A_23_P330209	RFFL	8.8611	10.4283
A_24_P466231	NA	7.29974	5.14041
A_23_P98864	GOLGA3	6.72353	8.54448
A_24_P392622	NA	6.70478	7.92257
A_32_P75661	PDIA6	7.09396	8.74399
A_32_P25694	NA	3.73401	5.32614
A_24_P752279	NA	10.3557	9.25504
A_24_P922451	NA	7.01326	8.37266
A_23_P90626	CYTIP	2.37917	4.56422
A_32_P108748	FBXL5	9.14663	7.73309
A_32_P91468	RFESD	3.44109	4.49258
A_23_P53081	OSBPL5	10.4616	11.4631
A_23_P419107	TCP11L2	6.73324	8.36379
A_24_P29859	C8orf46	2.27388	5.27697
A_23_P68219	TTN	4.3064	5.44567
A_23_P143102	NA	7.50063	6.42677
A_24_P496297	NA	2.74214	4.51699
A_23_P18662	TKTL2	2.27845	5.60804
A_23_P144847	CDH12	4.86214	6.00406
A_24_P876352	NA	2.32063	4.76348
A_23_P143190	MYBL2	10.058	9.02462
A_24_P119627	LOC100505824	3.71218	4.95053
A_24_P192840	UEVLD	8.69006	7.61588
A_32_P156062	NA	5.42	6.85978
A_23_P166929	SERPINI1	4.97301	7.36442
A_24_P253780	DBF4B	6.78908	5.46367
A_24_P922261	SRGAP1	8.98292	10.088
A_24_P147398	VPS53	3.47577	4.5785
A_32_P62480	NA	7.67422	6.0496
A_32_P337508	ODF3L2	5.68723	4.61604
A_24_P255384	NA	6.11102	7.12819
A_32_P331139	CFAP126	2.28464	4.6864
A_32_P230537	NA	8.59234	9.66344
A_23_P63847	SUPV3L1	9.91554	11.0445
A_24_P870362	lnc-CMBL-1	2.41585	6.14458
A_32_P24165	FANCD2	12.0772	10.5967
A_23_P417415	ACOT11	7.68299	6.66398
A_32_P880454	NA	5.35369	4.00376
A_23_P66174	SBK1	5.09155	2.66412
A_23_P115482	UBE2T	13.4297	12.3043
A_23_P257043	GEM	9.64209	10.6811
A_23_P4082	CCT6B	5.86748	7.60443
A_24_P229164	HIP1R	6.97837	8.12205
A_23_P99942	LRRK1	9.1079	8.01079
A_24_P592871	NA	7.80009	6.70452
A_23_P45871	IFI44L	9.5165	10.6871
A_23_P308552	DLX3	2.96555	5.04841
A_24_P322354	SKA1	9.26596	8.10536
A_24_P917897	NA	4.15526	6.19824
A_23_P3065	C14orf105	2.29456	5.16072
A_32_P189952	NA	7.32152	8.47676
A_24_P162211	LSS	6.07583	7.99946
A_23_P257538	RBBP9	10.8608	9.53196
A_24_P27644	NA	2.83817	4.92361
A_23_P254512	EFNA1	12.1254	13.6959
A_24_P300379	PI16	3.60598	4.65076
A_23_P101516	KCNC3	7.55619	8.74503
A_23_P161152	PDSS1	10.6573	9.65697
A_24_P166613	EPDR1	12.8304	11.3628
A_32_P4475	NA	2.27728	6.09043
A_24_P84970	NA	6.90612	8.22914
A_24_P173754	C1orf21	7.57831	9.31443
A_23_P305210	ZNF680	4.9802	3.84147
A_32_P143245	CENPW	13.6017	12.5709
A_23_P362736	RSPH10B	2.24423	4.93991
A_23_P330578	LRRC39	5.36025	7.70474
A_23_P385105	PLCD4	11.5573	10.4351
A_23_P341443	MNT	12.3981	13.5868
A_23_P312837	GLIS3-AS1	3.18724	6.22604
A_23_P383819	TBX3	7.03342	9.31056
A_23_P311875	CD6	4.97042	2.70342
A_32_P137299	NA	6.5712	8.49322
A_24_P458168	NA	3.58994	4.94925
A_23_P411353	ZCCHC5	2.27626	5.30071
A_23_P143994	FANCD2	9.17164	7.55377
A_23_P126075	KCNK1	12.3843	13.6848
A_24_P341006	NA	7.83348	9.0496
A_23_P123112	ABCB4	2.94483	6.64711
A_24_P174346	ATP5G3	7.62207	6.23371
A_24_P24972	NA	8.75418	10.3553
A_23_P75299	LHPP	10.6208	11.8286
A_23_P213038	GSTCD	7.6784	6.46596
A_24_P179903	AK2	13.8155	14.852
A_24_P829107	BZRAP1-AS1	2.99942	5.0558
A_23_P76136	TSPAN11	2.26462	5.1341
A_24_P158536	RHOBTB1	7.70934	9.36653
A_24_P58759	NA	7.5396	8.73563
A_24_P453793	LOC441124	6.77158	8.36512
A_32_P36694	JAZF1	8.55321	6.39515
A_24_P170667	ARID5B	10.7847	12.709
A_23_P399851	GANAB	7.05536	8.2726
A_24_P944714	ATP8A2	6.70393	8.67405
A_24_P937405	PRSS23	10.2432	11.721
A_32_P750514	EFCAB6	3.37179	4.84911
A_32_P35294	XLOC_l2_003905	2.5202	6.00704
A_23_P34126	BGN	2.31996	4.53745
A_23_P152873	NEK8	5.4891	6.52575
A_23_P340308	TAS2R19	3.72265	4.86068
A_23_P887	IKBKE	6.1024	4.69902
A_32_P33434	ZNF812	3.72857	4.81762
A_24_P75948	NA	6.85453	8.86005
A_23_P429020	HKR1	7.42501	9.01847
A_24_P348326	IL27RA	11.4042	10.2562
A_24_P64393	MARCH5	7.70875	6.67769
A_23_P250164	HGD	3.25765	5.60284
A_23_P202532	PTPN20B	5.73836	4.59122
A_24_P212549	NA	2.24478	5.48883
A_24_P703197	NA	4.7421	2.28402
A_24_P644742	HAUS6	9.72433	7.63237
A_32_P223747	NA	2.30656	4.74455
A_32_P150876	LINC00667	7.34781	8.63198
A_24_P13381	TRPV4	6.85571	5.69279
A_32_P138103	NA	5.19407	6.29591
A_24_P23865	LRRC58	9.55792	7.94513
A_24_P482104	TMEM232	4.28102	5.88852
A_23_P358370	FOXE1	9.21639	8.17029
A_32_P3127	KPNA4	11.483	9.32665
A_23_P340271	LMX1A	6.74187	5.25684
A_24_P930418	RBPMS	5.36108	6.8478
A_23_P205900	NTRK3	3.52286	4.69971
A_23_P347029	TAS2R50	3.54689	5.24434
A_23_P343843	CENPBD1	7.42809	8.64549
A_23_P55706	RELB	13.1833	11.7992
A_23_P92042	ITPR1	11.3993	13.2256
A_23_P213857	C7	5.4285	7.05455
A_23_P140748	NDRG4	11.0057	12.0991
A_23_P415791	KIAA1210	3.32902	4.93951
A_32_P214054	NA	8.24979	9.36761
A_32_P80741	C8orf22	5.23034	3.57493
A_23_P130974	KIAA1683	7.10142	8.19957
A_23_P30163	KLF3-AS1	4.43033	5.46919
A_32_P120567	MDFIC	7.244	5.33569
A_24_P107918	CBFB	8.46468	7.38551
A_24_P916314	HIP1	7.85585	6.60328
A_23_P106069	NA	3.62547	4.88652
A_32_P162507	GFRA2	8.09201	6.23909
A_23_P160481	DCAF6	8.90657	9.99385
A_24_P333019	RNF24	9.44495	10.628
A_23_P116850	KRT2	5.00317	2.32623
A_23_P370097	TMEM237	11.8354	10.5319
A_32_P37143	GAS2L3	8.74793	7.13069
A_24_P920016	FAM200B	6.52997	7.69987
A_32_P208654	PIWIL2	3.67354	5.94452
A_32_P80597	ELOVL6	6.03091	4.02711
A_32_P132393	NA	5.9025	4.31224
A_23_P131611	TTC30A	5.09439	6.10053
A_23_P154740	KIZ	9.63974	10.9218
A_24_P659836	SYCE3	5.3197	6.85124
A_23_P500844	PDE5A	4.93749	6.28107
A_23_P52121	PDZK1	7.9662	9.7696
A_23_P85693	GBP2	6.29275	7.76561
A_24_P289994	NA	2.31267	4.67486
A_23_P123463	ERI1	6.98322	5.89926
A_23_P119152	NA	3.87033	5.45944
A_23_P423543	REEP3	11.1975	10.0732
A_24_P369656	TRIM9	6.85713	5.35254
A_23_P411922	PRPF40B	7.53642	8.66208
A_23_P110122	CCNG2	9.47254	10.8573
A_32_P128023	NA	5.54498	7.43208
A_32_P57172	NA	5.43587	6.80815
A_32_P46214	SLC9A9	6.01726	7.22504
A_24_P288979	GNPTAB	9.40971	8.14903
A_24_P276888	CENPO	10.2812	9.23069
A_24_P84401	N6AMT1	5.49978	6.53337
A_32_P102935	SPDYA	4.15119	5.31112
A_24_P409042	CDC42SE2	11.8005	9.96361
A_23_P122210	NA	5.03445	6.96922
A_23_P141974	TPM4	11.1123	12.7052
A_24_P376139	NA	6.4608	7.59413
A_23_P1519	PITPNM1	6.77408	5.7294
A_24_P464489	NA	8.38947	9.43122
A_24_P236091	ENO2	11.3478	12.5574
A_23_P138465	NOLC1	9.033	10.1626
A_23_P19192	LYPLA1	10.7644	9.0251
A_24_P32935	FOLR2	4.11199	5.58686
A_23_P127926	WEE1	8.49308	7.47167
A_32_P34107	WNT2B	2.30375	6.15037
A_23_P327462	RFX6	3.07399	7.19193
A_23_P121102	HESX1	5.45214	6.80696
A_32_P48256	NA	4.70259	3.40547
A_23_P151915	GCNT3	7.54867	8.71117
A_32_P120127	TEX36-AS1	3.1653	5.73102
A_23_P98995	CALCOCO1	8.40676	10.0254
A_32_P8551	NRN1L	3.53484	4.60588
A_32_P221799	HIST1H2AM	10.7451	9.45823
A_23_P201619	NEK7	8.3275	6.53762
A_24_P152855	NA	5.65479	7.10763
A_23_P119886	GCKR	2.30385	5.49472
A_23_P156010	PCDHB12	4.56167	5.63489
A_24_P367399	NA	8.05231	9.432
A_24_P398691	ABHD13	5.68666	4.04203
A_23_P76145	ARNTL2	10.9002	9.82761
A_24_P388940	SMIM8	7.22202	6.00348
A_24_P211229	YIPF2	7.16773	8.25782
A_23_P24211	MMP21	2.52882	5.576
A_23_P398943	KIR3DX1	2.70342	5.67419
A_32_P352743	FAM19A3	5.60145	4.52207
A_23_P66635	CCL11	3.98241	5.37144
A_23_P119254	ASF1B	12.5701	10.261
A_23_P56091	TMIGD2	6.22871	5.15201
A_23_P99292	RAD51AP1	9.09446	7.92525
A_32_P58062	NA	6.4578	5.19346
A_32_P95729	FANCI	12.0932	10.4199
[truncated: 3,174 more rows]
