# Supplementary material for: Androgen-Responsive Oncogenic lncRNA RP11-1023L17.1 Enhances c-Myc Protein Stability in Prostate Cancer
Source: Int J Mol Sci. 2022 Oct 13;23(20):12219. doi: 10.3390/ijms232012219 (PMC9603324; doi:10.3390/ijms232012219)
Supplement: Supplementary file 1 [file ijms-23-12219-s001.zip › Table S6.xlsx]

## Sheet: Sheet1
Transcription factor	The number of genes 1
MYC (V$EBOX)	169
JUN (V$CREB, V$AP1F)	89
SP1 (V$SP1F)	81
E2F1 (V$E2FF)	79
EGR1 (V$EGRF)	77
FOS (V$AP1F)	73
STAT3 (V$STAT)	56
CEBPB (V$CEBP)	55
CREB1 (V$CREB)	54
ESR1 (V$EREF)	44
STAT1 (V$IRFF, V$STAT)	41
TBP (O$VTBP)	38
IRF1 (V$IRFF)	36
SOX2 (V$SORY, V$STEM)	31
YY1 (V$YY1F)	29
YY1 (V$YY1F)	29
E2F4 (V$E2FF)	28
NR3C1 (V$GREF, V$NGRE)	25
CDX2 (V$CDXF)	24
JUND (V$AP1F)	23
MYBL2 (V$MYBL)	23
TP53 (V$P53F)	22
SPI1 (V$ETSF)	22
KLF5 (V$KLFS)	22
RXRA (V$RXRF, V$FXRE, V$PERO)	21
NFE2L2 (V$AP1R)	19
ETS1 (V$ETSF)	19
RUNX3 (V$HAML)	19
ETS2 (V$ETSF)	19
NFKB1 (V$NFKB)	18
CTCF (V$CTCF)	18
TFDP1 (V$E2FF)	18
ATF3 (V$CREB)	17
GATA2 (V$GATA)	17
GATA3 (V$GATA)	16
TP63 (V$P53F)	16
FOXA1 (V$FKHD)	16
STAT5A (V$STAT)	15
ATF2 (V$CREB)	15
TCF7L2 (V$LEFF)	14
NFAT5 (V$NFAT)	13
NFYA (V$CAAT)	13
TFAP2A (V$AP2F)	12
GABPA (V$ETSF)	12
SREBF1 (V$SREB)	11
REST (V$NRSF)	11
RUNX1 (V$HAML)	10
GATA1 (V$GATA)	10
FOXA2 (V$FKHD)	10
CEBPD (V$CEBP)	10
HOXC6 (V$HOXF, V$HOXC)	10
MXI1 (V$EBOX)	10
TAF1 (O$TF2D)	10
1 Genes has a validated binding site with the transcription factor and had at least 1 interac-tion evidences.
